1 **Inflammation and autoimmunity are interrelated in patients with sickle cell disease at a**  
2 **steady-state condition: implications for vaso-occlusive crisis, pain, and sensory**  
3 **sensitivity**

4  
5 Wei Li<sup>1\*</sup>, Andrew Q Pucka<sup>2</sup>, Candice Debats<sup>2</sup>, Brandon Reyes<sup>2</sup>, Fahim Syed<sup>1</sup>, Andrew R  
6 O'Brien<sup>3</sup>, Rakesh Mehta<sup>3</sup>, Naveen Manchanda<sup>3</sup>, Seethal A Jacob<sup>4</sup>, Brandon M Hardesty<sup>5</sup>, Anne  
7 Greist<sup>3,5</sup>, Steven E Harte<sup>6</sup>, Richard E Harris<sup>6,7</sup>, Qigui Yu<sup>1\*</sup>, Ying Wang<sup>2,3\*</sup>

8  
9 <sup>1</sup>Department of Microbiology and Immunology, Indiana University School of Medicine,  
10 Indianapolis, IN 46202

11 <sup>2</sup>Department of Anesthesia, Stark Neurosciences Research Institute, Indiana University School  
12 of Medicine, Indianapolis, IN 46202

13 <sup>3</sup>Division of Hematology/Oncology, Department of Medicine, Indiana University School of  
14 Medicine, Indianapolis, IN 46202

15 <sup>4</sup>Center for Pediatric and Adolescent Comparative Effectiveness Research, Indiana University  
16 School of Medicine, Indianapolis, IN 46202

17 <sup>5</sup>Indiana Hemophilia and Thrombosis Center, Indianapolis, IN 46260

18 <sup>6</sup>Chronic Pain and Fatigue Research Center, Department of Anesthesiology, University of  
19 Michigan Medical School, Ann Arbor, MI 48106

20 <sup>7</sup>Susan Samueli Integrative Health Institute, and Department of Anesthesiology and  
21 Perioperative Care, School of Medicine, University of California at Irvine, Irvine, CA 92617

22  
23 **\*Corresponding authors**

24 Address correspondence to Dr. Ying Wang (ywa12@iu.edu), Department of Anesthesia, Indiana  
25 University School of Medicine, Stark Neuroscience Building, Rm# 514E, 320 West 15th Street,  
26 Indianapolis, IN 46202, Tel: 317-278-5045; Dr. Wei Li (wl1@iupui.edu) or Dr. Qigui Yu

27 (andyu@iupui.edu), Department of Microbiology and Immunology, Indiana University School of  
28 Medicine, Medical Science Building, MS267, 635 Barnhill Drive, Indianapolis, IN 46202, Tel:  
29 317-274-2391.

30

31 **Key words:** Sickle cell disease, inflammation, autoantibody, aggregate, steady-state condition,  
32 vaso-occlusive crisis, pain sensitivity

33

34 **Running title:** Inflammation, autoantibody, RBC-leukocyte aggregation, and vaso-occlusive  
35 crisis in SCD participants

36

37 **Abbreviations:**  $\alpha 4\beta 1$ , alpha-4 beta-1; **ANA**, anti-nuclear autoantibody; **CDT**, cold detection  
38 threshold; **CPT**, cold pain threshold; **CPM**, conditioned pain modulation; **CRP**, C-reactive  
39 protein; **DC**, dendritic cell; **EC**, endothelial cell; **GPA**, glycoporphin A; **HADS**, Hospital Anxiety  
40 and Depression Scale; **HC**, healthy control; **HCT**, hematocrit; **HDT**, heat detection threshold;  
41 **Hgb**, hemoglobin; **HPT**, heat pain threshold; **LIF**, leukemia inhibitory factor; **Lu/BCAM**,  
42 lutheran/basal cell adhesion molecule; **MCV**, mean corpuscular volume; **MCH**, mean  
43 corpuscular hemoglobin; **MDT**, mechanical detection threshold; **MFI**, median fluorescent  
44 intensity; **MPO**, myeloperoxidase; **MPT**, mechanical pain threshold; **MTS**, mechanical temporal  
45 summation; **PBMC**, peripheral blood mononuclear cell; **PedsQL**, Pediatric Quality of Life  
46 Inventory; **PMN**, polymorphonuclear neutrophil; **PPT**, pressure pain threshold; **PPTol**, pressure  
47 pain tolerance; **PROMIS**, Patient-Reported Outcomes Measurement Information System;  
48 **PROMs**, patient-reported outcome measures; **QoL**: quality of life; **QST**, quantitative sensory  
49 testing; **RBC**, red blood cell; **RDW**, red cell distribution width; **SCD**, sickle cell disease; **SLE**,  
50 systemic lupus erythematosus; **SSA/Ro60**, Sjögren's Syndrome-related antigen A/Ro60 kDa;  
51 **StSt**, steady-state condition; **TSLP**, thymic stromal lymphopoietin; **TSP**, temporal summation of  
52 pain; **VOC**, vaso-occlusive crisis; **WBC**, white blood cell.

53

54 **Conflict of interest**

55 The authors declare no conflicts of interest that pertain to this manuscript.

56

57 **Abstract**

58 This study aimed to comprehensively analyze inflammatory and autoimmune  
59 characteristics of patients with sickle cell disease (SCD) at a steady-state condition (StSt)  
60 compared to healthy controls (HCs) to explore the pathogenesis of StSt and its impact on  
61 patients' well-being. The study cohort consisted of 40 StSt participants and 23 HCs enrolled  
62 between July 2021 and April 2023. StSt participants showed elevated white blood cell (WBC)  
63 counts and altered hematological measurements when compared to HCs. A multiplex  
64 immunoassay was used to profile 80 inflammatory cytokines/chemokines/growth factors in  
65 plasma samples from these SCD participants and HCs. Significantly higher plasma levels of 37  
66 analytes were observed in SCD participants, with HGF, IL-18, IP-10, and MCP-2 being among  
67 the most significantly affected analytes. Additionally, autoantibody profiles were also altered,  
68 with elevated levels of anti-SSA/Ro60, anti-Ribosomal P, anti-Myeloperoxidase (MPO), and  
69 anti-PM/Scl-100 observed in SCD participants. Flow cytometric analysis revealed higher rates of  
70 red blood cell (RBC)/reticulocyte-leukocyte aggregation in SCD participants, predominantly  
71 involving monocytes. Notably, correlation analysis identified associations between inflammatory  
72 mediator levels, autoantibodies, RBC/reticulocyte-leukocyte aggregation, clinical lab test results,  
73 and pain crisis/sensitivity, shedding light on the intricate interactions between these factors. The  
74 findings underscore the potential significance of specific biomarkers and therapeutic targets that  
75 may hold promise for future investigations and clinical interventions tailored to the unique  
76 challenges posed by SCD. In addition, the correlations between vaso-occlusive crisis  
77 (VOC)/pain/sensory sensitivity and inflammation/immune dysregulation offer valuable insights  
78 into the pathogenesis of SCD and may lead to more targeted and effective therapeutic  
79 strategies.

80

## 81 **Introduction**

82           Sickle cell disease (SCD) is a lifelong illness that affects multiple organ systems and can  
83 cause a range of complications, including acute and chronic pain, anemia, stroke, pulmonary  
84 hypertension, and organ damage (1, 2). The clinical manifestations of SCD can be broadly  
85 categorized into two phases: the steady-state (StSt) phase, characterized by mild to no  
86 symptoms associated with chronic hemolysis and persistent pain (3), and the severe pain and  
87 other clinical complications in the acute hemolytic/vaso-occlusive crisis (VOC) phase (4, 5). The  
88 acute VOC phase is marked by the sudden onset of severe pain, possibly accompanied with  
89 acute chest syndrome and stroke due to the blockage of small blood vessels by sickle-shaped  
90 red blood cells (RBCs). Individuals with SCD requiring high doses of opioids to manage VOC  
91 confront a series of substantial risks, such as an increased vulnerability to overdose and  
92 mortality, the potential development of opioid-induced hyperalgesia, and a compromised quality  
93 of life (QoL). Addressing these challenges becomes paramount, emphasizing the urgent need  
94 for evidence-based, effective, and safe pain management therapies tailored specifically for  
95 SCD. Indeed, pain is the hallmark of SCD, manifesting anywhere in the body and profoundly  
96 impacting patients' QoL (6-8). SCD pain can manifest as acute recurrent painful crises  
97 associated with VOCs as well as chronic pain with or without nerve damage (7). The painful  
98 crisis, which evolves through four phases—prodromal, initial, established, and resolving—is a  
99 leading cause of hospitalization and emergency department treatments in SCD (7).

100           SCD is characterized by the presence of sickle-shaped RBCs with altered biophysical and  
101 biochemical properties (9). Unlike normal RBCs, which have a biconcave disc shape for  
102 flexibility and deformability, sickle-shaped RBCs lose their ability to deform and navigate  
103 through small blood vessels efficiently, leading to blockages and reduced blood flow. To  
104 compensate for the RBC loss, bone marrow produces more immature RBCs known as  
105 reticulocytes, releasing them into circulation and leading to elevated reticulocyte levels in the

106 blood. In SCD participants, reticulocytes express higher levels of surface adhesion molecules  
107 such as Lutheran/basal cell adhesion molecule (Lu/BCAM) and alpha-4 beta-1 ( $\alpha 4\beta 1$ ) integrin  
108 (10-15). These adhesion molecules facilitate the binding of reticulocytes to the endothelium  
109 lining the blood vessels, causing activation of endothelial cells (ECs) and the release of  
110 inflammatory molecules (16-18). Moreover, reticulocytes in SCD interact with circulating  
111 leukocytes, including polymorphonuclear neutrophils (PMNs) and monocytes, leading to the  
112 formation of aggregates and increasing the occurrence of VOCs (19-21). These interactions are  
113 primarily mediated by  $\alpha 4\beta 1$  integrin and Lu/BCAM, reinforcing their adhesion to the endothelium  
114 (9, 22). *In vitro* studies have demonstrated that sickle-shaped RBCs can also bind to peripheral  
115 leukocytes, especially monocytes, via erythroid LW/ICAM-4 and CD44 receptors. These  
116 RBC/reticulocyte-leukocyte aggregates interact with ECs, resulting in EC activation (21). Thus,  
117 SCD is associated with increased adhesion of RBC/reticulocytes to leukocytes and ECs, which  
118 contribute to the complex pathophysiology underlying SCD pain (10-18).

119       Chronic inflammation persists in SCD due to continuous activation of immune cells or  
120 autoimmune responses triggered by various factors, such as hemolysis, vaso-occlusion, and  
121 sickle-shaped RBC aggregates. Hemolysis is a primary inflammatory trigger in SCD (17).  
122 Sickle-shaped RBCs are more fragile and prone to rupture, leading to the chronic release of  
123 hemoglobin and other cellular components. Hemoglobin is a potent pro-inflammatory molecule  
124 that activates immune cells such as monocytes, macrophages, and dendritic cells (DCs),  
125 prompting them to produce pro-inflammatory cytokines such as IL-1 $\beta$  (23), IL-6 (24), and TNF- $\alpha$   
126 (23). Additionally, heme, an iron-containing component of hemoglobin, can further induce the  
127 production of pro-inflammatory cytokines, chemokines, and adhesion molecules by activating  
128 NF- $\kappa$ B and TLR4 signaling pathways, and promote the recruitment of leukocytes and platelets to  
129 sites of inflammation, exacerbating the inflammatory response (25). In addition, vaso-occlusion  
130 of small blood vessels by sickle-shaped RBCs leads to tissue ischemia and subsequent  
131 hypoxia, activating ECs. The activated ECs produce and release pro-inflammatory cytokines

132 and adhesion molecules (26, 27), which recruit lymphocytes to the site of inflammation, further  
133 perpetuating the inflammatory response. Furthermore, chronic activation of the coagulation  
134 system in SCD participants results in the release of pro-inflammatory mediators such as  
135 thrombin, which can activate ECs and promote the recruitment of inflammatory cells. SCD is  
136 also associated with oxidative stress, which contributes to inflammation by activating the NF- $\kappa$ B  
137 pathway, leading to the production of pro-inflammatory cytokines and chemokines. Finally, the  
138 impact of autoantibodies on inflammation in SCD participants is noteworthy. Chronic hemolysis  
139 and cell damage release intracellular components like hemoglobin, heme, and cellular debris  
140 into the bloodstream, triggering the production of autoantibodies. These autoantibodies  
141 exacerbate inflammation by forming immune complexes that activate pro-inflammatory  
142 pathways, recruit immune cells, and contribute to tissue damage. Highlighting the complex  
143 pathophysiology that contributes to inflammation in SCD, a recent study quantified serum levels  
144 of 27 inflammatory cytokines, chemokine, and growth factors in 27 individuals in StSt, 22  
145 individuals in VOC, and 53 healthy individuals (28). The study found that both pro- and anti-  
146 inflammatory cytokines are involved in the inflammatory response during SCD, regardless of  
147 clinical phase (28). This suggests that the dysregulation of cytokine production and balance may  
148 play a role in the disease's pathophysiology.

149 The current study represents the initial phase of an ongoing clinical trial (ClinicalTrials.gov,  
150 NCT05045820) focused on investigating the clinical efficacy and neurobiological mechanisms of  
151 acupuncture analgesia in SCD participants, for which recruitment is ongoing. The primary  
152 objective of the current study was to characterize the pain and the underlying immune and  
153 inflammatory abnormalities in SCD participants. To achieve this objective, we examined plasma  
154 levels of inflammatory cytokines, chemokines, growth factors, soluble receptors, and effector  
155 molecules, as well as the profiles of autoantibodies and the aggregation between  
156 RBCs/reticulocytes and leukocytes. Moreover, we investigated the association between these  
157 analytes and VOCs, patient reported pain- and QoL-related outcomes, and sensory sensitivity.

158 Our long-term goal is to identify potential mechanisms and therapeutic targets in SCD, gaining  
159 an improved understanding of the mechanisms behind acupuncture intervention.

160

## 161 **Materials and Methods**

162

### 163 **Study participants**

164 This work constitutes an initial part of an ongoing randomized clinical trial in SCD that  
165 commenced on June 29, 2021, and is scheduled to conclude on May 31, 2026. The primary  
166 inclusion criteria for participant enrollment included: 1) has been diagnosed with SCD, 2)  
167 experiencing chronic pain within the last 6 months or encountered at least one VOC within the  
168 past 12 months, 3) no recent changes in stimulant medication dosage or initiation, 4) willingness  
169 to continue their ongoing treatments, and 5) an agreement to limit using any new medications or  
170 treatment methods for pain management throughout the study. The major exclusion criteria  
171 included: 1) individuals with COVID-19 suspected or confirmed, 2) recent or ongoing pain  
172 management using acupuncture or acupuncture-related techniques within the last 6-months,  
173 and 3) presence of a concurrent autoimmune or inflammatory disease such as rheumatoid  
174 arthritis, systemic lupus erythematosus (SLE), and inflammatory bowel disease. In addition,  
175 participants who received a blood transfusion within the 90 days prior to recruitment were  
176 excluded for analyses. Age-, gender-, and ethnicity-matched health subjects without SCD were  
177 recruited as healthy controls (HCs). Detailed information regarding the inclusion and exclusion  
178 criteria can be found on ClinicalTrials.gov (NCT05045820).

179 Peripheral blood samples were collected from 40 SCD participants, comprising 17 males  
180 and 23 females, with ages ranging from 14 to 73 years. All participants were Black/African  
181 American. SCD participants and HCs were enrolled in this study through Indiana University  
182 Health hospitals in Indianapolis, the Indiana Hemophilia & Thrombosis Center, community



183 hospitals, and other resources between July 2021 to April 2023. Peripheral blood was collected  
184 at StSt phase in heparin-coated tubes (BD Biosciences, Franklin Lakes, NJ) and subsequently  
185 separated into plasma and peripheral blood mononuclear cells (PBMCs). PBMCs were either  
186 directly used or cryopreserved in liquid nitrogen until use. Plasma samples were stored at -80°C  
187 until use. To establish a comparison, we included PBMC and plasma samples from 23 healthy  
188 volunteers, matched in terms of age, sex, and race, to serve as HCs. Detailed demographic and  
189 clinical characteristics of both SCD participants and HCs are summarized in Table 1. This study  
190 was performed with the approval of the Institutional Review Boards (IRB) at Indiana University  
191 School of Medicine, and each participant provided written informed consent during the  
192 screening visit prior to the subsequent study procedure.

193

#### 194 **Patient-reported outcome measures (PROMs)**

195 The Patient-Reported Outcomes Measurement Information System (PROMIS)-29  
196 Questionnaire was used to evaluate pain intensity and interference, as well as physical function  
197 (29). Neuropathic pain symptoms were evaluated using the PainDETECT Questionnaire (higher  
198 score indicated higher pain) (30, 31). The Widespread Pain Index was used to evaluate the  
199 spatial distribution of pain across the body (higher score indicated higher pain) (32, 33). In  
200 addition, depression was evaluated using the Hospital Anxiety and Depression Scale (HADS)  
201 (higher score indicated higher depression) (34). Physical function was assessed with PROMIS-  
202 29 (higher score indicated more physical dysfunction) (29). Pain-related QoL was evaluated  
203 using the Pediatric Quality of Life Inventory (PedsQL) targeting 3 different age groups (13-18,  
204 18-25, or 25+ years old), with higher scores representing better QOL (35). The number of  
205 patient-reported VOCs in the preceding 12 months was documented (36, 37). The number of  
206 days between blood draw and the most recent or future VOCs was recorded as the time  
207 intervals after or before VOCs.

208

209 **Quantitative Sensory Testing (QST)**

210 QST is a well-established experimental protocol designed to investigate both ascending  
211 excitatory and descending inhibitory aspects of pain processing by assessing an individual's  
212 perceptual response to various stimuli (38). QST was performed at up to three different body  
213 sites, including the primary testing site(s), which was the area(s) reported as most painful by  
214 each patient, along with the dominant-side ventral forearm and/or the dominant-side upper  
215 trapezius muscle, as described in previous studies on SCD (38, 39). HCs received primary  
216 testing at sites matched with those identified in patients, in addition to testing at the dominant  
217 forearm and/or trapezius.

218 Thermal (heat/cold) Detection/Pain Threshold was determined at each testing site using a  
219 TCA11 (QST-Lab, Strasbourg, France) with a thermal probe in contact with the subject's skin  
220 surface. The thermode temperature was gradually adjusted from a baseline temperature at a  
221 controlled rate of 0.5 - 1 °C/s. Subjects indicated the thermal detection threshold (when they first  
222 felt the thermal stimulus) and the hot pain threshold (when they first felt pain from the thermal  
223 stimulus). The average of three trials for each test was used for analysis.

224 Mechanical Detection Threshold (MDT)/Mechanical Pain Threshold (MPT) were examined  
225 using von Frey monofilaments (Stoelting, Wood Dale, IL) and calibrated pinprick stimuli (MRC  
226 Systems GmbH, Heidelberg, Germany) respectively. Each von Frey monofilament was applied  
227 three times in ascending sequence until the stimulus was detected in at least two out of three  
228 trials. The next lower von Frey monofilament was then applied, and the lowest filament to be  
229 detected at least twice was considered the detection threshold. The MPT was determined using  
230 different pinprick probes applied to the skin surface of each site. Testing started with a  
231 stimulation intensity of 8 mN and in each case, the next higher pinprick stimulator was applied  
232 until the perception of "touch" changed its quality towards an additional percept of "sharp",

233 “pricking,” or “stinging.” The corresponding intensity represented the first suprathreshold value.  
234 Once the first painful stimulus was perceived, the testing direction was changed step-wise  
235 towards lower stimulus intensities until the first stimulus perceived as “blunt” and no longer as  
236 being “sharp,” “pricking” or “stinging” (subthreshold value). Again, a directional change towards  
237 higher intensities occurred and the cycle was repeated until five suprathreshold and five  
238 subthreshold values were determined. An inflection point was calculated as the average value  
239 of the ten suprathreshold and subthreshold to determine the MPT.

240 Mechanical Temporal Summation (MTS) was assessed using a single 256 mN pinprick  
241 (MRC Systems GmbH, Heidelberg, Germany) stimulus applied in triplicate to the skin surface of  
242 the selected sites, followed by a series of 10 identical stimuli (1 Hz – metronome-guided). MTS  
243 was calculated as the average pain rating from the series of 10 stimuli minus the average pain  
244 rating from the three trials with the single stimulus.

245 Pressure Pain Threshold (PPT)/Pressure Pain Tolerance (PPTol) was assessed using a  
246 digital, handheld pressure algometer (Algometer II, Somedic SenseLab AB, Norra Mellby,  
247 Sweden). The pressure was manually increased at a rate of 50 kPa/s (1000 kPa max) until  
248 participants indicated that the sensation of pressure became one of faint pain (PPT) and the  
249 maximum pressure pain that the participant can tolerate (PPTol), respectively. The average of 3  
250 trials per site was used for analysis.

251 Conditioned Pain Modulation (CPM): Tonic pressure pain was used as the conditioning  
252 stimulus delivered via a cuff (Hokanson, Bellevue, WA) attached to the gastrocnemius muscle of  
253 the non-dominant leg. Pressure intensities were individually calibrated for each participant to  
254 elicit moderate pain (pain rating at 40-60 on a scale of 100) (40, 41). PPT served as the test  
255 stimulus and was measured 3 times at the dominant trapezius muscle prior to and during the  
256 cuff stimulation. Pain ratings were obtained every 15 s prior to and during cuff stimulation for up  
257 to 90s. CPM magnitude was calculated as patient-reported pain ratings during conditioned cuff  
258 pressure stimuli.

259 Only QST results on the standard sites (forearm, trapezius) were used for correlation  
260 analysis as each SCD participant often had different primary painful site(s).

261

## 262 **Multiplex immunoassays and enzyme-linked immunosorbent assay (ELISA)**

263 Plasma concentrations of 80 inflammatory human cytokines, chemokines, growth factors,  
264 soluble receptors, and effector molecules and 18 human autoantibodies were simultaneously  
265 measured using the Immune Response 80-Plex Human ProcartaPlex™ Panel (Cat. #: EPX800-  
266 10080-901, Invitrogen, Carlsbad, CA) and the MILLIPLEX MAP Human Autoimmune  
267 Autoantibody Panel (HAIAB-10K, MilliporeSigma, Burlington, MA), respectively, according to the  
268 manufacturer's instructions. The beads were read on a BioPlex 200 system (Bio-Rad, Hercules,  
269 CA). The standards at 4-fold serial dilutions were run on each plate in duplicate and used to  
270 calculate the concentrations of human cytokines, chemokines, growth factors, soluble receptors,  
271 and effector molecules using the Bio-Plex Manager Software (Bio-Rad, Hercules, CA) as  
272 previously reported (42). Plasma samples were diluted 100-fold for the autoantibody multiplex  
273 assay, and the levels of the autoantibodies were reported as mean fluorescence intensity (MFI)  
274 after background MFI subtraction. The plasma levels of C-reactive protein (CRP) were  
275 quantified using human CRP DuoSet ELISA Kit (R&D Systems, Minneapolis, MN) according to  
276 the manufacturer's instructions.

277

## 278 **Flow cytometry**

279 Freshly prepared PBMCs were stained with fluorochrome-conjugated antibodies against  
280 human CD45, CD71 (expressed on erythroid precursors), BCAM, and CD235ab (also known as  
281 GPA: glycophorin A, the major sialoglycoprotein on RBCs and their precursors) to measure the

282 aggregation between RBC/erythroid precursors and CD45<sup>+</sup> leukocytes. Cells stained with  
283 surface markers were acquired using a BD LSRFortessa flow cytometer (BD Biosciences, San  
284 Jose, CA). Flow data were analyzed using FlowJo v10 software (Tree Star, San Carlos, CA).  
285 The percentage of CD235ab<sup>hi</sup> cells among the CD45<sup>+</sup> leukocytes was defined as the  
286 RBC/reticulocyte-leukocyte aggregation rate. The association of RBCs/reticulocytes with  
287 lymphocytes or monocytes were determined based on their characteristics of FSC and SSC on  
288 flow cytometry, respectively.

289

## 290 **Statistical analysis**

291 Statistical analysis was performed using GraphPad Prism 10 and SPSS 29. Data were  
292 expressed as median and interquartile range (Tables 1-3). Differences between 2 groups were  
293 calculated using the Mann-Whitney test for continuous variables (Tables 1-2).  $\chi^2$  test was used  
294 for comparison between 2 groups for gender distribution (Table 1). Adjusted  $p$  values were  
295 calculated for the 80-plex and 18-plex analytes using the Holm-Šídák correction for multiple  
296 comparisons (Table 3). Inflammatory mediators that were heightened in the SCD participants  
297 were used for subsequent Spearman correlation analyses using age, gender and SCD  
298 genotype as covariables (Tables 4-6).  $p < 0.05$  was considered statistically significant. # $p < 0.06$   
299 was considered a clear trend toward significance.

300

## 301 **Results**

302 **Characteristics of the study cohort: demographics, laboratory exams, patient reported**  
303 **outcomes and sensory sensitivity**

304 Demographics and clinical characteristics of participants are summarized in Table 1. SCD  
305 participants and HCs showed no significant differences in terms of age and gender distribution.  
306 Compared to the HCs, SCD participants exhibited higher numbers of white blood cells (WBCs),  
307 reticulocytes, platelets, neutrophils, monocytes, and basophils but reduced RBCs, hemoglobin,  
308 and hematocrit (HCT). Additionally, SCD participants displayed elevated levels of mean  
309 corpuscular volume (MCV), mean corpuscular hemoglobin (MCH), red cell distribution width  
310 (RDW), and the systemic inflammation marker CRP than HCs (Table 1). The differences in the  
311 absolute numbers of lymphocytes and eosinophils approached a clear trend toward significance  
312 ( $p < 0.06$ ) between the two groups (Table 1).

313 As indicated in Table 2, SCD participants reported increased pain interference and  
314 intensity, more painful body sites, reduced physical functioning, and higher levels of depression  
315 relative to HCs. Compared to HCs, SCD participants also displayed hypersensitivity to  
316 experimental mechanical (MDT, MTP, MTS), cold (CPT), and pressure stimuli (PPT and PPTol),  
317 but not hot stimuli (HDT, HPT) as measured by QST (Table 2).

318

319 **SCD participants presented with elevated proinflammatory cytokines, chemokines,**  
320 **growth factors, effector molecules, and soluble receptors compared to HCs**

321 SCD participants had significantly higher plasma levels of 35 analytes compared to HCs  
322 (Table 3). These elevated analytes encompassed 10 chemokines (CCL21, CCL23, Eotaxin-2,  
323 Gal-3, GRO- $\alpha$ , IP-10, MCP-2, MIP-1 $\alpha$ , MIP-1 $\beta$ , and MIP-3 $\alpha$ ), 2 effector molecules (granzymes A  
324 and B), 9 growth factors (BAFF, bNGF, G-CSF, GM-CSF, HGF, IL-7, IL-20, IL-34, and LIF), 8  
325 pro-inflammatory cytokines (IFN- $\gamma$ , IL-1 $\alpha$ , IL-2, IL-8, IL-9, IL-18, TNF- $\alpha$ , and TNF- $\beta$ ), 4 type II  
326 inflammatory/anti-inflammatory cytokines (IL-4, IL-5, IL-6, and TSLP), and 2 immune modulating  
327 soluble receptors (PTX3 and TREM-1) (Table 3 and Supplementary Table 1). In addition, levels  
328 of the endothelial cell growth factor VEGF-A and the proinflammatory cytokine IL-17A trended

329 higher in the SCD participants ( $p < 0.06$ ) (Table 3 and Supplementary Table 1). After being  
330 corrected for multiple comparisons, 9 out of the 37 altered analytes remained significantly higher  
331 in the SCD participants compared to the HCs. These included 4 chemokines (CCL23, Gal-3, IP-  
332 10, and MCP-2), 2 growth factors (HGF and IL-34), 2 proinflammatory cytokines (IFN- $\gamma$  and IL-  
333 18), and the soluble receptor PTX3 (Table 3 and Supplementary Table 1). Notably, among  
334 these altered analytes, HGF, IL-18, IP-10, and MCP-2 exhibited the most significant  
335 upregulation in SCD participants in comparison to HCs (Table 3 and Supplementary Table 2).

336

337 **Both anti-nuclear autoantibodies (ANAs) and non-ANAs were present and elevated in**  
338 **SCD participants**

339 Plasma concentrations of autoantibodies against 18 human antigens were simultaneously  
340 measured using a multiplex immunoassay. We identified the presence of autoantibodies against  
341 4 human antigens, including Sjögren's Syndrome-related antigen A/Ro60 kDa (SSA/Ro60),  
342 ribosomal P, myeloperoxidase (MPO), and PM/Scl-100, which were significantly elevated in  
343 SCD participants when compared to HCs (Fig. 1A, 1B). After multiple comparison corrections,  
344 SSA/Ro60 and MPO remained significantly higher in the SCD subjects ( $p = 0.048$  and  $p =$   
345  $0.022$ , respectively). It is noteworthy that while SSA/Ro60 autoantibody is typically classified as  
346 an ANA, autoantibodies against the ribosomal P, MPO, or PM/Scl-100 are not categorized as  
347 ANAs (non-ANAs). Thus, both ANAs and non-ANAs in the bloodstream were significantly  
348 elevated in SCD participants compared to HCs.

349

350 **SCD participants exhibited abnormally high rates of RBC/reticulocyte-leukocyte**  
351 **aggregation**

352 RBC/reticulocyte-leukocyte aggregates in SCD participants were assessed using flow  
353 cytometry (Fig. 2A). Freshly isolated PBMCs were stained with antibodies against human CD45  
354 (a marker expressed on all leukocytes), CD235ab (a marker expressed on RBCs and their  
355 precursors), BCAM, and CD71 (transferring receptor-1, a specific marker of reticulocytes  
356 among the RBC population). As depicted in Fig. 2B, the percentage of total CD235ab<sup>hi</sup>CD45<sup>+</sup>  
357 aggregates were significantly higher in SCD participants compared to HCs. The percentage of  
358 CD71<sup>+</sup> reticulocyte aggregates was significantly higher in SCD participants compared to HCs  
359 (Fig. 2C, left panel). In parallel, the percentage of CD71<sup>+</sup> reticulocytes in free fraction were  
360 also significantly higher in SCD participants compared to HCs, indicating an increase of  
361 reticulocytes in SCD participants (Fig. 2C, right panel). Similarly, BCAM expression on  
362 aggregates or unaggregated RBCs was significantly higher in SCD participants compared to  
363 HCs (Fig. 2D). This observation suggested that StSt PBMC samples contained higher numbers  
364 of RBCs or RBC precursors, such as reticulocytes, and higher levels of the cell adhesion  
365 molecule BCAM, thus contributing to the increased occurrence of aggregates. Compared to  
366 HCs, the percentage of CD45<sup>+</sup> lymphocytes in the aggregates were significantly lower in SCD  
367 participants, whereas the frequency of monocytes was higher (Fig. 2E). When the immune cell  
368 types in PBMCs and the aggregates in the SCD participants were analyzed and compared,  
369 monocytes were enriched within the aggregates with a corresponding decrease of  
370 lymphocytes within aggregation relative to PBMCs (Fig. 2F), indicating RBCs/RBC  
371 precursors preferentially interacted with monocytes within the aggregates.

372

373 **Comprehensive analysis revealed correlations of inflammatory mediators with**  
374 **autoantibodies and RBC/reticulocyte-leukocyte aggregation in SCD participants**



375 Next, we evaluated correlations between the 37 elevated inflammatory mediators (9  
376 analytes with adjusted  $p < 0.05$  bolded) that were listed in Table 3, altered autoantibodies  
377 targeting SSA/Ro60, ribosomal PMPO, and PM/Scl-100, and RBC/reticulocyte-leukocyte  
378 aggregation in StSt participants (Table 4). The elevated plasma level of IL-4 and IL-5, both type  
379 II cytokines known for facilitating the development of B cells into antibody-producing plasma  
380 cells, exhibited significant positive associations with SSA/Ro60 autoantibodies. These  
381 autoantibodies are a type of ANAs commonly linked to autoimmune diseases such as SLE  
382 (Table 4) (43). IL-4 also exhibited a trend towards correlation with ribosomal P and MPO  
383 autoantibodies ( $r = 0.31$ ,  $p = 0.076$  for both). Additionally, SSA/Ro60 autoantibodies showed  
384 associations with multiple inflammatory mediators, including the effector molecule granzyme A,  
385 2 growth factors (IL-34 and VEGF-A), and 2 proinflammatory cytokines (IL-1a and IL-9).  
386 Furthermore, both IL-1a and MIP-1b positively correlated with the non-ANA autoantibodies  
387 against MPO. Conversely, none of the 37 elevated inflammatory mediators were found to be  
388 associated with anti-PM/Scl-100 autoantibodies (data not shown).

389 We also analyzed the association of the inflammatory mediators with RBC/reticulocyte-  
390 leukocyte aggregation. Two chemokines (CCL23 and MIP-1a) and the growth factor HGF  
391 exhibited positive associations with the percentage of RBC/reticulocyte-leukocyte aggregates  
392 (Table 4). Together, our data demonstrate that inflammation is closely linked to autoimmunity  
393 and RBC aggregation with leukocytes in SCD participants at the steady state.

394

### 395 **Correlation analysis uncovered significant associations between inflammatory mediators** 396 **and autoantibodies with VOCs/pain/sensory sensitivity**

397 To investigate potential underlying factors contributing to VOCs, we examined the  
398 relationships of the elevated 37 inflammatory mediators, 4 autoantibodies, or RBC/reticulocyte-

399 leukocyte aggregates with the intervals before and after VOC episodes (Table 5). After being  
400 adjusted for age, gender, and SCD genotypes, 6 inflammatory mediators (Extaxin-2, GRO- $\alpha$ , IL-  
401 2, IL-6, IL-17A, and LIF) showed positive correlations with the time intervals after VOCs.  
402 Conversely, the inflammatory cytokine IL-18 and granzyme A exhibited negative associations  
403 with the time interval before VOCs. These results suggest that specific inflammatory mediators,  
404 namely granzyme A and IL-18, might play a crucial role in the early detection or development of  
405 VOCs.

406       Next, we analyzed correlations of the inflammatory mediators with pain and sensory  
407 sensitivity as assessed by PROMs and QST. As presented in Table 6, several inflammatory  
408 mediators were associated with patient-reported pain intensity, physical function, and sensory  
409 sensitivity. A group of inflammatory mediators (G-CSF, granzyme A, BAFF, IL-9, and IL-17A)  
410 exhibited positive correlations with PedsQL scores. Conversely, most of the correlations  
411 between inflammatory mediators and various PROMs were negative. Specifically, 19  
412 inflammatory mediators (CCL23, GM-CSF, GRO-a, MCP-2, Granzyme B, BAFF, bNGF, IL-7, IL-  
413 20, LIF, IL-2, IL-9, IL-17A, TNF-a, TNF-b, IL-5, IL-6, TSLP, and TREM-1) displayed negative  
414 associations with physical and psychological PROMs (Pain Intensity, Pain Episode, Depression  
415 Score, and Physical Function Score). Notably, 16 of the 19 factors were negatively correlated  
416 with the Physical Function Score, while 8 of them had negative correlations with Pain Episode  
417 Frequency/Recency. Moreover, 9 out of the 19 factors (Granzyme B, IL-20, LIF, IL-2, IL-17A,  
418 TNF-b, IL-5, IL-6, and TSLP) showed a positive association with the mechanical threshold (MDT  
419 forearm). Two additional factors, CCL21 and IL-8, were also positively associated with the MDT  
420 forearm. Five factors (Eotaxin-2, CCL21, GRO-a, MCP-2, and TREM-1) displayed positive  
421 correlations with pressure threshold (PPT trapezius). Furthermore, a group of inflammatory  
422 factors (Eotaxin-2, CCL21, GRO-a, MCP-2, MIP-3a, HGF, VEGF-A, IL-8, TNF-a, TNF-b, IL-5,  
423 and TREM-1) displayed negative correlations with mechanical pain threshold (MPT forearm and  
424 MTS forearm), and sensitivity threshold to cold (CPT forearm). Of note, several inflammatory

425 factors, including GRO-a, MCP-2, granzyme B, IL-2, IL-17A, TNF-b, IL-5, and TREM-1, showed  
426 correlations with multiple measures from both PROMs and QST,

427 We also assessed the relationship of PROMs and experimental sensory sensitivity with  
428 the autoantibodies and RBC/reticulocyte-leukocyte aggregations (Table 6). We found that  
429 elevated autoantibodies against MPO exhibited a negative correlation with Physical Function  
430 Score and strong positive correlations with PPT (trapezius) and PPTol (trapezius). However, no  
431 correlations were detected between PROMS/QST and increased rate of RBC/reticulocyte-  
432 leukocyte aggregation, as well as BCAM and CD71 expression on the aggregates. Together,  
433 our results indicate that multiple inflammatory/autoimmune markers are inversely associated  
434 with the well-being of the SCD participants.

435

## 436 **Discussion**

437 This study represents an interim analysis of an ongoing clinical trial that aims at  
438 investigating the clinical efficacy and neurobiological mechanisms of acupuncture analgesia in  
439 SCD participants (NCT05045820). Results showed that SCD participants in StSt showed higher  
440 levels of sensory sensitivity, as well as increased pain intensity, pain interference, widespread  
441 pain, physical dysfunction, and depression compared to HCs (Table 2). These results highlight  
442 the significant impact of SCD on patients' physical and emotional well-being and align with  
443 previous studies on SCD (30, 34, 38, 39, 44, 45).

444 We collected cross-sectional blood samples and clinical parameters to comprehensively  
445 study inflammatory mediators, autoantibody profiles, and presence of RBC/reticulocyte-  
446 leukocyte aggregates, exploring their interrelations and potential relationship with VOCs, QoL,  
447 and sensory sensitivity. Specifically, we examined the plasma levels of 80 inflammatory  
448 mediators (Supplementary Table 1), the profiles of autoantibodies against 18 human antigens  
449 (Fig. 1), and the presence of RBC/reticulocyte-leukocyte aggregates in these participants (Fig.

450 2). Moreover, we investigated the correlations between these analytes and their potential  
451 relationship with VOCs, QoL, and sensory sensitivity in SCD participants. By examining these  
452 analytes and their relationships, we sought to identify potential mechanisms and therapeutic  
453 targets for further exploration and investigation.

454 SCD is characterized by a persistent pro-inflammatory state that leads to elevated levels  
455 of inflammatory mediators in the bloodstream. Inflammatory mediators are vital signaling  
456 molecules that play a crucial role in the development of pain, VOCs, and the pathogenesis of  
457 SCD (8, 17, 46). A recent study measured the serum levels of 27 inflammatory mediators  
458 including 15 cytokines, 7 chemokines, and 5 growth factors in 27 StSt and 53 HCs (28). The  
459 results revealed that significantly higher levels of several cytokines, chemokines, and growth  
460 factors in SCD participants compared to HCs (28). Strikingly, SCD participants exhibited  
461 elevated serum concentrations of pro-inflammatory molecules, such as IL-1 $\beta$ , IL-12p70, and IL-  
462 17A, when compared to SCD participants experiencing VOC (28). Here we expanded the  
463 spectrum of analyses and observed that SCD participants exhibited higher plasma levels of 37  
464 out of 80 analytes, including 13 pro-inflammatory/anti-inflammatory cytokines, 10 chemokines,  
465 10 growth factors, 2 effectors, and 2 soluble receptors (Table 3 and supplementary Tables 1  
466 and 2). These findings collectively indicate a pro-inflammatory bias in SCD participants as  
467 compared to HCs.

468 Numerous cytokines elevated in our study, such as IL-1 $\alpha$ , IL-4, IL-5, IL-6, IL-7, IL-8, TNF- $\alpha$   
469 were previously shown to be involved in VOC-related acute clinical complications such as acute  
470 chest syndrome, pulmonary hypertension, and pulmonary thrombosis (47-53). Systemic  
471 inflammation and modulation of the immune system with crosstalk of immunological molecules  
472 and immune cells were associated with the pathogenesis of persistent pain and the onset of  
473 VOCs in SCD. Plasma IFN- $\gamma$  was augmented in steady-state SCD, which could modulate  
474 macrophage function and increase T helper cell expansion in SCD and most likely reflect  
475 inflammasome formation in inflammatory cells (52, 54, 55). Endothelium activation could in turn

476 produce and release a number of potent inflammatory molecules, including IL-1 $\alpha$ , IL-1 $\beta$ , IL-6, IL-  
477 8, GM-CSF, MCP-1, plasminogen activator inhibitor-1, and RANTES (52, 53, 56-58). The  
478 maturation and release of bioactive IL-1 $\beta$  and IL-18 (59-65), two vital immunoregulatory and  
479 proinflammatory cytokines, are governed by inflammatory caspases operating within specialized  
480 signaling platforms referred to as inflammasomes. Elevated plasma levels of IL-1 $\beta$  and IL-18 in  
481 SCD participants strongly suggest an aberration in the regulation of inflammasome activation  
482 within this particular group. In addition, IL-1 $\beta$  exerts a potent activation effect on leukocytes and  
483 ECs. Meanwhile, IL-18 plays an important role in stimulating vascular smooth muscle cell  
484 proliferation and migration, along with promoting the productions of IFN- $\gamma$ , IL-2 and IL-12. These  
485 actions collectively exacerbate the inflammatory milieu in SCD participants (51, 54, 55). Notably,  
486 excessive production of IL-8 and RANTES contributes to the dehydration of sickle RBC, leading  
487 to an increase in RBC density and rigidity (66). This, in turn, enhances the adhesion of RBCs to  
488 the endothelium (67), a phenomenon closely linked to the severity of VOCs. These findings  
489 suggest that SCD participants experience persistently high levels of inflammatory mediators  
490 during StSt phases, even in the absence of severe clinical symptoms like VOCs.

491 Several inflammatory mediators were associated with the presence of autoantibodies and  
492 RBC/reticulocyte-leukocyte aggregation in SCD participants. Specifically, 8 inflammatory factors  
493 (MIP-1b, granzyme A, IL-34, VEGF-A, IL-1a, IL-9, IL-4, and IL-5) were positively associated with  
494 autoantibodies targeting 2 human antigens (SSA/Ro60 and MPO) (Table 4). Anti-SSA/Ro60  
495 autoantibodies are typically classified as ANAs, while anti-MPO autoantibodies are categorized  
496 as non-ANAs. Thus, our results indicate that elevated inflammatory mediators are closely linked  
497 to both ANAs (anti-SSA/Ro60 autoantibodies) and non-ANAs (anti-MPO autoantibodies) in the  
498 bloodstream of SCD participants. Notably, the vast majority (7 out of 8) of inflammatory  
499 mediators displayed positive associations with both ANA (SSA/Ro60) and non-ANAs (Table 4).  
500 Given that mature RBCs in mammals lack nuclei, mitochondria, and other organelles (68), these  
501 inflammatory mediators are more likely to be implicated in autoimmune responses to cellular

502 debris from other types of cells rather than mature RBCs. This finding suggests a potential link  
503 between ANA-associated autoimmunity and the presence of specific inflammatory mediators,  
504 which may contribute to our understanding of autoimmune processes and their association with  
505 certain cellular components in SCD.

506 In SCD participants, a complex and detrimental cycle is established through the interplay  
507 between inflammation and the formation of RBC/reticulocyte-leukocyte aggregates (69, 70).  
508 Inflammatory mediators disrupt immune responses, leading to an increased aggregation of  
509 RBCs/reticulocytes with leukocytes. Consequently, these aggregates exacerbate blood vessel  
510 blockages, further impeding blood flow and perpetuating the cycle of inflammation and tissue  
511 damage. This process triggers the release of additional inflammatory mediators, thus fueling a  
512 vicious circle of inflammation and VOCs. This vicious circle plays a significant role in the  
513 pathophysiology of SCD and significantly contributes to the recurrent pain crises and organ  
514 damage observed in affected individuals. We analyzed the association of inflammatory  
515 mediators with RBC/reticulocyte-leukocyte aggregation. In line with previous studies, our results  
516 also revealed 2 chemokines (CCL23 and MCP-1a) and 1 growth factor (HGF) that were  
517 associated with the aggregation (Table 4). These results provide important insights into the  
518 relationship between inflammation and RBC/reticulocyte-leukocyte aggregates that are  
519 associated with the occurrence and severity of VOCs.

520 SCD participants experience sudden and intense episodes of VOCs, which are  
521 challenging to predict and manage (71, 72). However, understanding of the circulating markers  
522 and their pathological processes during the transitioning phase from StSt to VOC episodes is  
523 extremely limited due to the unpredictable and rapid progression of the onset of VOCs. A  
524 previous study identified PDGF-BB and IL-1R $\alpha$  as potential indicators for the acute-to-chronic  
525 stage in SCD (28). Our data revealed that 2 elevated inflammatory mediators (IL-18 and  
526 granzyme A) were associated with time the intervals prior to VOC onset and 6 mediators  
527 (Extaxin-2, GRO- $\alpha$ , IL-2, IL-6, IL-17A, and LIF) were associated with time intervals after active

528 VOCs (Table 5), suggesting that these 8 mediators hold the potential to serve as novel  
529 biomarkers for predicting VOC episodes. Of particular note, IL-18 has emerged as a critical  
530 proinflammatory regulator in both innate and adaptive immune responses (73), and blocking IL-  
531 18 has been associated with mitigating neuropathic symptoms and enhancing the analgesic  
532 activity of morphine and buprenorphine (74). Inhibition of Granzyme A has been shown to  
533 reduce the levels of IL-6 and TNF- $\alpha$  (75). Thus, our results underscore the significance of  
534 specific inflammatory mediators in the early detection and development of VOCs, as well as  
535 potential avenues for pain management in SCD participants experiencing VOCs.

536         The existing literature has extensively studied the inflammation- and immunity-based  
537 mechanisms in SCD as compared to HCs, as well as the differences between StSt and VOC  
538 phases. However, there are limited studies investigating the relationship of inflammatory  
539 markers with clinical symptoms and sensory sensitivity during StSt. In the present study, we  
540 found that multiple inflammatory molecules were negatively associated with pain intensity  
541 (higher score indicated higher pain), the frequency/recency of clinical pain episodes (higher  
542 score indicated higher frequency/recency of acute pain episodes), emotional distress  
543 (depression), and physical dysfunction (higher score indicated higher physical dysfunction) in  
544 SCD participants. Conversely, higher levels of several soluble factors correlated with higher  
545 QoL and less pain. SCD participants with less severe Pain Episodes Score (higher score  
546 indicated higher severity) were associated with higher levels of GRO- $\alpha$ , MCP-2, granzyme B,  
547 bNGF, IL-7, IL-2, IL-17, and TREM 1 (Table 6). Of particular interest, higher IL-17A levels were  
548 also correlated with less pain intensity, physical dysfunction and higher QoL (higher PedsQL  
549 score indicated higher QoL). In fact, elevated IL-17A is associated with absence of acute chest  
550 syndrome in SCD participants, indicating a protective role (76). Consistently, higher levels of  
551 many inflammatory markers were also associated with decreased sensory sensitivity (in other  
552 words: increased threshold/tolerance to experimental stimuli) in response to mechanical (MDT,  
553 MPT, MTS), thermal (CPT), and pressure (PPT and PPTol) stimuli. We observed that SCD

554 participants who had higher levels of Eotaxin-2, CCL21, GRO-a, MCP-2, HGF, and TREM-1  
555 simultaneously exhibited lowered cold pain sensitivity (in other words: increased tolerance of  
556 cold-induced pain). These novel findings have not been reported in existing literature in SCD.  
557 The underlying mechanisms of these intriguing observations are unknown and warrant future  
558 investigation. We speculate that SCD participants experiencing recurrent extremely painful  
559 VOCs-related episodes developed resistance and pain inhibitory effect, thus exhibited  
560 decreased sensory sensitivity and increased tolerance to experimental pain stimuli, which  
561 therefore inhibited the antidromic release of proinflammatory mediators at periphery. This  
562 correlation profile suggested the interactive and distinct roles of inflammatory mediators in the  
563 processing of pain, and sensory sensitivity at StSt, and could be utilized for more extensive  
564 studies to explore the underlying nociceptive pathways in SCD.

565 In line with the correlation profile presented in Table 6, elevated anti-MPO autoantibodies  
566 were associated with decreased sensitivity and tolerance to pressure pain (PPT trapezius and  
567 PPTol trapezius). Notably, MPO plays a crucial role as a marker and modulator of inflammation  
568 and oxidative stress, primarily originating from activated leukocytes and neutrophils (77). A  
569 previous study demonstrated that increased MPO impairs EC function through vascular  
570 oxidative stress, while inhibiting MPO shows promise in improving vasodilation in mouse models  
571 of SCD (78). Furthermore, many SCD participants experience heightened cold sensitivity (79),  
572 and exposure to potential triggers, such as cold temperatures or stress, can induce  
573 vasoconstriction, potentially leading to VOC (80, 81). Therefore, elevated autoantibodies, such  
574 as anti-MPO autoantibodies (Fig.1), might contribute to vasoconstriction during the prodromal  
575 phase of VOCs while simultaneously interacting with immune- and inflammatory-targets (Table  
576 4) to modulate pain inhibitory effect at StSt.

577 Inflammation, autoimmunity, and RBC/reticulocyte-leukocyte aggregations are believed to  
578 play a significant role in the pathogenesis of pain and VOCs in SCD participants (23, 82, 83).  
579 However, the direct connections of these factors with pain and VOCs in SCD participants are



580 not fully understood. Our comprehensive analyses of these cross-sectional clinical samples  
581 provide valuable insights into the correlations between inflammatory mediators, autoantibody  
582 profiles, RBC/reticulocyte-leukocyte aggregation, clinical lab test results, and their associations  
583 with the onset of VOCs and pain sensitivity in SCD participants. This knowledge has the  
584 potential to significantly contribute to the development of suitable biomarkers/endpoints for  
585 clinical diagnosis of pain episodes in SCD participants, as well as targeted therapeutic  
586 approaches and improved management strategies for individuals affected by this condition.  
587 However, it is essential to acknowledge the limitations of our cross-sectional study, including  
588 small sample size, potential bias, confounding factors, the absence of insight into temporal  
589 trends, and the inability to establish causality. To address these limitations, we have undertaken  
590 efforts to collect longitudinal clinical samples throughout the duration of our clinical trial cohort  
591 and expand our sample size with ongoing recruitment efforts. This longitudinal approach is  
592 expected to provide a stronger foundation for establishing causal relationships between the  
593 analyzed variables. By observing changes over time, we can better infer cause-and-effect  
594 relationships of these variables, thus advancing our understanding of the mechanisms  
595 underlying the pathogenesis of SCD. Furthermore, the combination of cross-sectional and  
596 longitudinal approaches will enable us to gather complementary data, extending our  
597 investigations to address a broader range of clinical questions in both SCD participants and  
598 SCD participants experiencing acute VOC. The information gathered from these approaches will  
599 be pivotal in evaluating the clinical efficacy and neurobiological mechanisms of acupuncture  
600 analgesia in SCD participants participating in our clinical trial.

601

602 **Author contribution**

603 W.L., Q.Y., and Y.W. supervised experimental performance and data collection, analysis,  
604 and interpretation; A.Q.P., C.D., and B.R. assisted with data collection and figure preparation.  
605 F.S. assisted with data analyses and figure preparation; W.L., Q.Y., and Y.W. drafted and edited  
606 the manuscript; S.E.H., and R.E.H. helped with editing the manuscript; Y.W. and A.R.O.  
607 directed patient recruitment; A.R.O., R.M., N.M., S.A.J., B.M.H., A.G. facilitated recruitment for  
608 the study; Y.W. developed the concepts, directed overall performance and quality of the clinical  
609 investigation.

610

#### 611 **Authors Statement of Competing Interest**

612 All authors have read the journal's authorship agreement and policy on disclosure of  
613 potential conflicts of interest.

614

#### 615 **Acknowledgement**

616 The authors would like to thank Tyler James Barret, Nayana Dutt, Payton Mittman, Bea  
617 Paras, Ramat Gbemisola Suleiman-Oba, Amy Gao and Yongqi Yu for assisting with  
618 experimental performance, and clinical team staff at Indiana University Clinical Research Center  
619 for patient scheduling and blood draw performance.

620

#### 621 **Funding Support**

622           This work was supported by NIH K99/R00 award (Grant # 4R00AT010012 to Y.W.) and  
623   Indiana University Health – Indiana University School of Medicine Strategic Research Initiative  
624   funding to Y.W.  
625

Figure 1

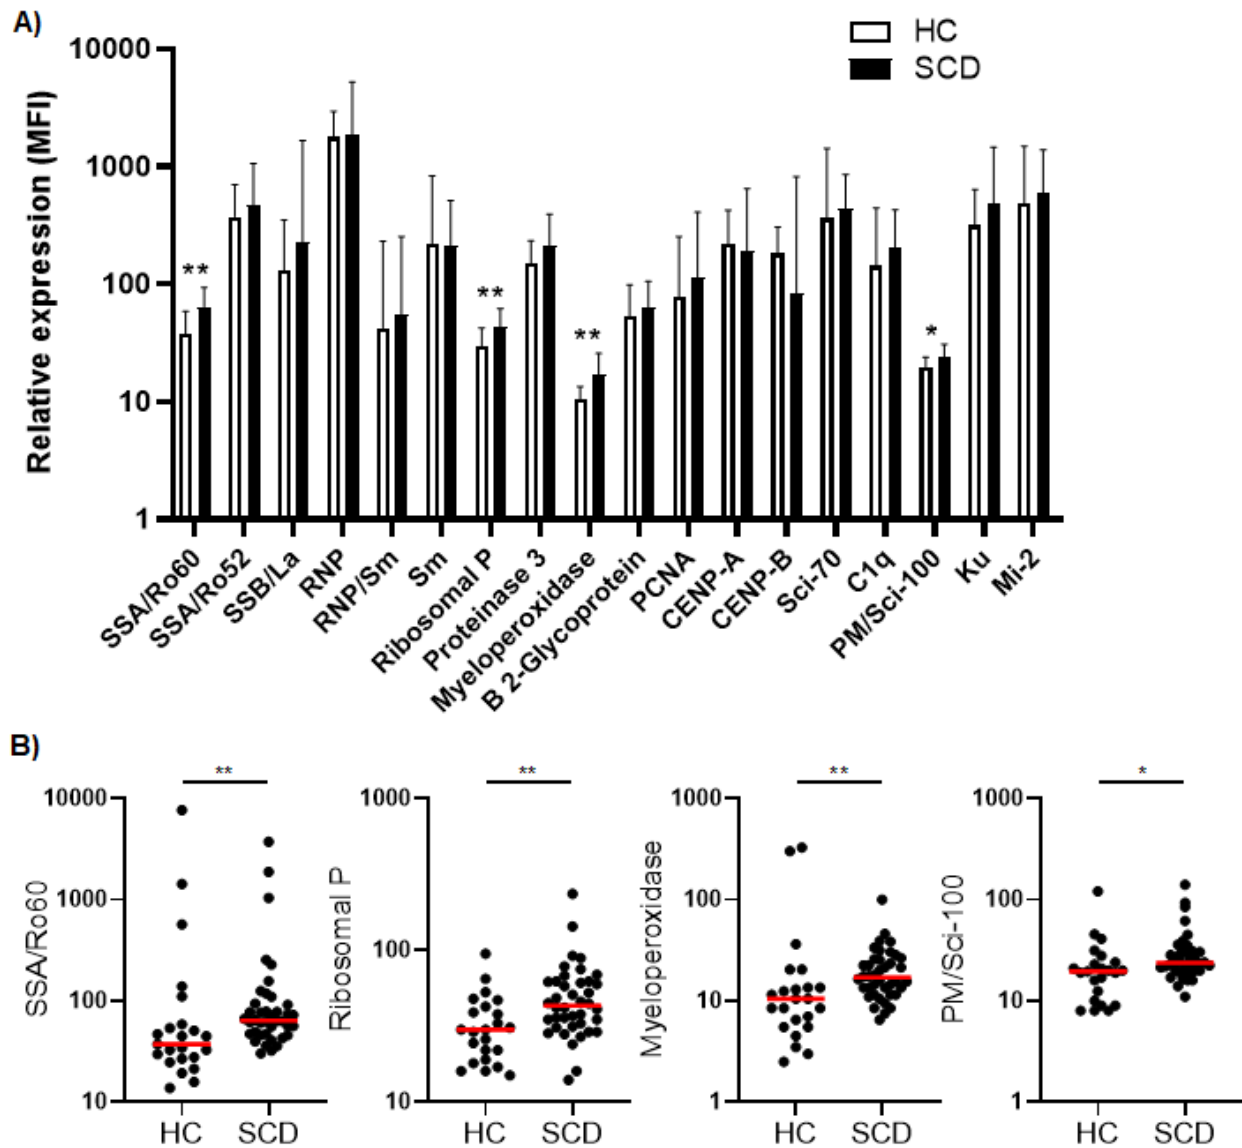

627

628 **Fig. 1. Comparative analysis of quantity and individual incidence of elevated**629 **autoantibodies in SCD participants versus healthy controls. A)** The levels of plasma

630 autoantibodies against 18 autoantigens in SCD participants (n=40) versus healthy controls

631 (HCs, n=23). The median fluorescence intensity (MFI) after background MFI subtraction was

632 used to represent relative expression of the 18 autoantibodies in SCD and HC samples, shown

633 as median + upper interquartile range (IQR). **B)** Scatter plots demonstrating the plasma levels

634 of 4 autoantibodies (anti-SSA/Ro60, anti-Ribosomal P, anti-Myeloperoxidase, and anti-PM/Scl-  
635 100) that were significantly elevated in SCD participants compared to healthy controls. Lines  
636 represent the median. SCD, sickle cell disease; HC, healthy control. Mann-Whitney test was  
637 used to compare the results from SCD patient versus HC samples. \* $p < 0.05$ ; \*\* $p < 0.01$ .  
638

**Figure 2**

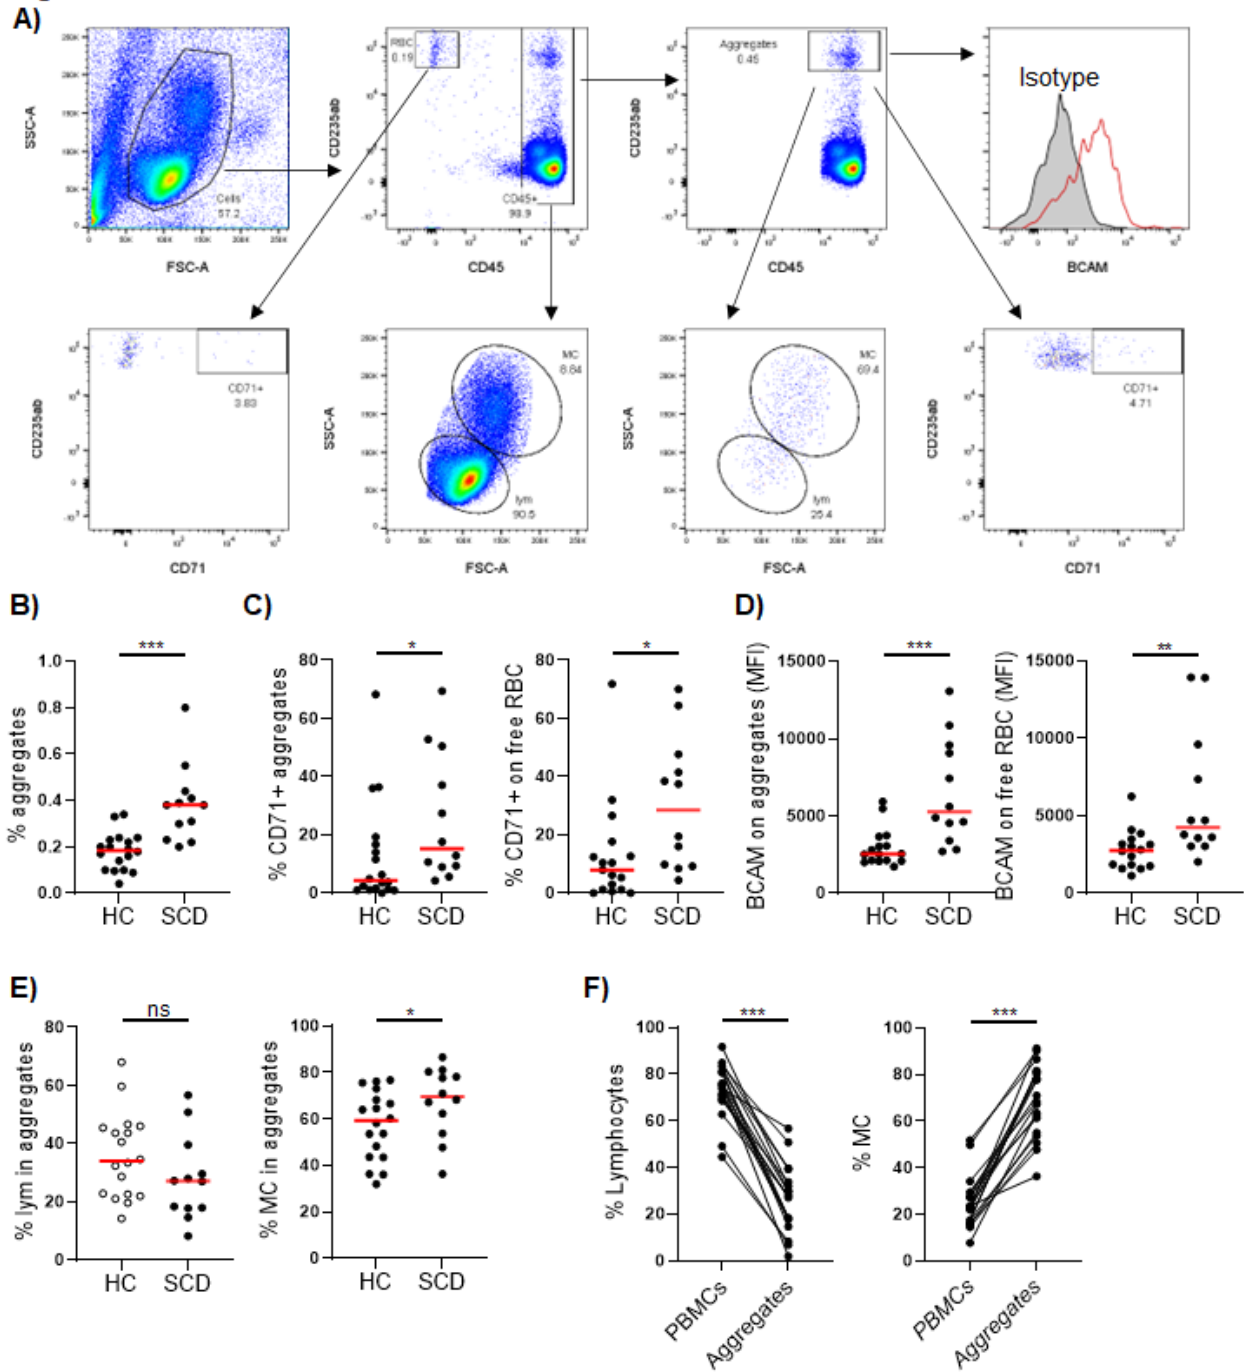

639

640 **Fig. 2. Comparison of RBC/reticulocyte aggregation with CD45<sup>+</sup> PBMCs in SCD**

641 **participants versus healthy controls.** Freshly isolated peripheral blood mononuclear cells

642 (PBMCs) from the SCD participants (n=12) and healthy controls (HC, n=17) were analyzed for

643 RBC/reticulocyte aggregation with CD45<sup>+</sup> PBMCs by flow cytometry. **A)** Gating strategies for

644 flow cytometric analysis of RBC/reticulocyte-CD45<sup>+</sup> leukocytes aggregation. PBMCs were  
645 stained with fluorochrome-conjugated antibodies against human CD45, CD235ab, CD71, BCAM  
646 and isotype control antibodies. CD235ab<sup>+</sup> cells that were not associated with CD45<sup>+</sup> PBMCs  
647 were defined as RBC/reticulocyte in free fraction (RBC). Within the CD45<sup>+</sup> cells, CD235ab<sup>hi</sup> cells  
648 were defined as the RBC/reticulocyte-CD45<sup>+</sup> leukocyte aggregates. The gate for CD71<sup>+</sup>  
649 RBC/reticulocyte and RBC/reticulocyte-leukocyte aggregates were based on the isotype control.  
650 BCAM level was expressed as mean fluorescent intensity (MFI). Lymphocytes (LYM) and  
651 monocytes (MC) were gated based on their FCS and SSC chromatistics. **B)** Scatter plots  
652 showing a significantly higher percentage of RBC/reticulocyte-CD45<sup>+</sup> leukocyte aggregation in  
653 the SCD participants than HC. **C, D)** Scatter plots displaying higher levels of CD71<sup>+</sup> erythroid  
654 precursors (C) and the cell adhesion molecule BCAM (D) on both aggregated and  
655 unaggregated RBC/reticulocyte in the SCD participants compared to HC. **E)** Scatter plots  
656 comparing the frequencies of lymphocytes and monocytes within RBC/reticulocyte-CD45<sup>+</sup>  
657 leukocyte aggregates. **F)** Before and after plots showing the percentages of lymphocytes (left)  
658 were reduced while those of monocytes (right) were heightened in the aggregates compared to  
659 PBMCs in the SCD subjects. Mann-Whitney test was used to compare the results from SCD  
660 patient versus HC samples. Wilcoxon test was used to calculate the differences between  
661 aggregates and PBMCs. \**p* < 0.05; \*\**p* < 0.01; \*\*\**p* < 0.001.

662

663

664

665

666

667

668

**Table 1. Clinical and hematological characteristics of the study participants**

| Parameters                                 | HCs (n=23)       | SCD (n=40)         | p value            |
|--------------------------------------------|------------------|--------------------|--------------------|
| <b>Demographics</b>                        |                  |                    |                    |
| Age (years)                                | 38 (22-57)       | 34 (23-41)         | 0.16               |
| Gender (% females)                         | 13 (57%)         | 23 (58%)           | 0.94               |
| SS/Sβ0/SC/Sβ+ thalassemia (n/n/n/n)        | N/A              | 23/3/11/3          |                    |
| <b>Hemogram/Platelets/WBC Differential</b> |                  |                    |                    |
| WBC (k/cumm)                               | 5.1 (4.0-6.3)    | 8.8 (6.1-11.4)     | <b>0.0001</b>      |
| RBC (million/cumm)                         | 4.6 (4.3-5.1)    | 2.9 (2.4-3.7)      | <b>&lt;0.0001</b>  |
| Hgb (GM/dL)                                | 13.0 (12.2-14.3) | 10.2 (8.0-11.6)    | <b>&lt;0.0001</b>  |
| HCT (%)                                    | 38.8 (36.4-41.9) | 29.2 (23.6-34.0)   | <b>&lt;0.0001</b>  |
| Absolute Retic Number (k/cumm)             | 48.8 (41.6-71.0) | 131.2 (88.5-216.4) | <b>&lt;0.0001</b>  |
| Hemoglobin A (%)                           | 97.4 (88.5-97.6) | 23.0 (13.8-30.6)   | <b>&lt;0.0001</b>  |
| Hemoglobin S (%)                           |                  | 63.4 (49.1-73.1)   |                    |
| Hemoglobin F (%)                           |                  | 5.8 (2.4-13.4)     |                    |
| MCV (fL) [81-99]                           | 86 (81-89)       | 94 (83-104)        | <b>0.020</b>       |
| MCH (pg) [27.0-34.0]                       | 28.4 (27.3-29.6) | 32.3 (27.5-35.8)   | <b>0.0033</b>      |
| RDW (%) [11.5-14.5]                        | 13.7 (13.3-14.9) | 18.4 (15.8-23.6)   | <b>&lt;0.0001</b>  |
| Platelet (k/cumm) [150-450]                | 246 (231-270)    | 309 (247-424)      | <b>0.0029</b>      |
| Absolute Neutrophil                        | 2.75 (1.6-3.8)   | 4.8 (3.1-7.2)      | <b>0.0005</b>      |
| Absolute Lymphocyte                        | 2.1 (1.5-2.5)    | 2.4 (1.7-4.1)      | 0.055 <sup>#</sup> |
| Absolute Monocyte                          | 0.4 (0.3-0.4)    | 0.8 (0.5-1.1)      | <b>&lt;0.0001</b>  |
| Absolute Eosinophil                        | 0.1 (0.1-0.2)    | 0.2 (0.1-0.4)      | 0.058 <sup>#</sup> |
| Absolute Basophil                          | 0 (0-0)          | 0.1 (0-0.1)        | <b>0.0007</b>      |
| <b>Immunological tests</b>                 |                  |                    |                    |
| C-reactive protein (mg/ml)                 | 1.1 (0.4-2.7)    | 3.9 (1.6-7.3)      | <b>0.0038</b>      |

669 **Note:** HCs, healthy controls; SCD, sickle cell disease; WBC, white blood cell; RBC, red blood  
670 cell; Hgb, hemoglobin; HCT, hematocrit; MCV, mean corpuscular volume; MCH, mean  
671 corpuscular hemoglobin; RDW, red cell distribution width. The Mann-Whitney test was used to  
672 compare differences between patients with SCD and healthy controls (HC) for continuous  
673 variables.  $\chi^2$  test was used for comparison of gender distribution between the 2 groups.  $p <$   
674 0.05 was considered significant. <sup>#</sup> $p < 0.06$  was considered as a clear trend toward significance.  
675  
676



**Table 2. Patient-reported outcome measures and quantitative sensory testing**

| Parameters                            | HCs (n=23)             | SCD (n=33)            | p value           |
|---------------------------------------|------------------------|-----------------------|-------------------|
| <b>PROMs</b>                          |                        |                       |                   |
| PainDetect_Total score                | 7 (7-7)                | 19 (14-24)            | <b>&lt;0.0001</b> |
| BPI_Pain Interference Score           | 0 (0-0)                | 4.2 (1.8-5.6)         | <b>&lt;0.0001</b> |
| FPS_Widespread Pain Index             | 0 (0-0)                | 6 (3-8)               | <b>&lt;0.0001</b> |
| PROMISE 29_Physical Function Score    | 4 (4-4)                | 7 (5-11.5)            | <b>&lt;0.0001</b> |
| PROMISE 29_Pain Intensity Score       | 0 (0-0)                | 5 (4-6)               | <b>&lt;0.0001</b> |
| HADS_Depression Score                 | 1 (0-3)                | 4.5 (2.0-7.8)         | <b>0.0002</b>     |
| Pain Episode Frequency Score          | N/A                    | 8 (6-9)               |                   |
| Number of VOCs in preceding 12 months | N/A                    | 4 (2-7)               |                   |
| PedsQL_Total Score                    | N/A                    | 52 (43-63)            |                   |
| <b>Quantitative Sensory Testing</b>   |                        |                       |                   |
| MDT (forearm)                         | 0.4 (0.2-0.5)          | 0.3 (0.1-0.5)         | <b>0.0433</b>     |
| MDT (primary site)                    | 0.3 (0.2-0.5)          | 0.2 (0.1-0.6)         | 0.4946            |
| MPT (forearm)                         | 77.0 (40.0-105.7)      | 62.4 (23.2-128.0)     | 0.6220            |
| MPT (primary site)                    | 83 (45.8-161.7)        | 41.6 (15.3-104.0)     | <b>0.0444</b>     |
| MTS (forearm)                         | 6.7 (0.0-29.2)         | 8.7 (3.3-23.3)        | 0.3783            |
| MTS (primary site)                    | 5.0 (1.5-18.8)         | 15.3 (5.3-23.0)       | <b>0.0434</b>     |
| CDT (forearm)                         | -2.4 ((-4.3)-(-1.6))   | -2.0 ((-3.1)-(-1.5))  | 0.3888            |
| CDT (primary site)                    | -2.0 ((-3.4)-(-1.4))   | -2.4 ((-3.5)-(-1.5))  | 0.5940            |
| CPT (forearm)                         | -13.3 ((-24.6)-(-5.4)) | -6.8 ((-13.1)-(-3.9)) | <b>0.0276</b>     |
| CPT (primary site)                    | -15.65 ((-26.5)-(-6))  | -7.3 ((-12.7)-(-4.3)) | <b>0.0274</b>     |
| HDT (forearm)                         | 3.3 (2.5-4.0)          | 3.6 (2.5-4.4)         | 0.8099            |
| HDT (primary site)                    | 3.6 (3.1-5.9)          | 4.1 (2.7-5.7)         | 0.6730            |
| HPT (forearm)                         | 7.8 (4.8-11.1)         | 8.7 (5.4-10.7)        | 0.9278            |
| HPT (primary site)                    | 7.3 (6.2-10.9)         | 8.3 (6.1-10.3)        | 0.8623            |
| PPT (trapezius)                       | 255.5 (179.3-364.5)    | 203.5 (164.0-278.5)   | <b>0.0404</b>     |
| PPT (primary site)                    | 321.0 (196.0-539.0)    | 192.0 (142.0-263.8)   | <b>0.0026</b>     |
| PPTol (trapezius)                     | 415.5 (341.8.5-559.6)  | 316.5 (2250-391.8)    | <b>0.0129</b>     |
| PPTol (primary site)                  | 526.0 (316.0-827.0)    | 302.0 (223.8-463.8)   | <b>0.0029</b>     |
| CPM (pain rating)                     | 43.0 (30.0-54.0)       | 39.0 (28.0-51.0)      | 0.7441            |

677 **Note:** HCs, healthy controls; SCD, sickle cell disease; MDT, mechanical detection threshold;  
678 MPT, mechanical pain threshold; MTS, mechanical temporal summation; Mechanical CDT, cold  
679 detection threshold; CPT, cold pain threshold; HDT, heat detection threshold; HPT, heat pain  
680 threshold; PPT, pressure pain threshold; PPTol, pressure pain tolerance; CPM, conditioned pain  
681 modulation. The Mann-Whitney test was used to compare differences between patients with  
682 SCD and HCs.  $p < 0.05$  was considered significant.  
683

**Table 3: Upregulated inflammatory mediators in SCD subjects as detected by 80plex immunoassay**

| Categories                    | Analytes                              | HCs (n=18)          | SCD (n=36)          | <i>p</i>             | Adjusted <i>p</i> |
|-------------------------------|---------------------------------------|---------------------|---------------------|----------------------|-------------------|
| <b>Chemokines</b>             | CCL21                                 | 0.1 (0-12.8)        | 20.4 (0.6-71.5)     | 0.00280              | 0.17337           |
|                               | <b>CCL23</b>                          | 487 (302-639)       | 874 (574-1285)      | 0.00014              | <b>0.01046</b>    |
|                               | Eotaxin-2                             | 0.1 (0-6.6)         | 10.4 (0-97.7)       | 0.04479              | 0.88393           |
|                               | <b>Gal-3</b>                          | 6749 (4949-8982)    | 15144 (6910-34355)  | 0.00055              | <b>0.03958</b>    |
|                               | GRO- $\alpha$                         | 1.7 (1.3-2.0)       | 2.4 (1.7-3.1)       | 0.00625              | 0.33050           |
|                               | <b>IP-10</b>                          | 17.2 (10.1-25.6)    | 36.9 (21.3-60.7)    | 0.00012              | <b>0.00891</b>    |
|                               | <b>MCP-2</b>                          | 0.2 (0.1-0.7)       | 2.1 (0.7-5.3)       | 0.00001              | <b>0.00091</b>    |
|                               | MIP-1 $\alpha$                        | 0 (0-1.6)           | 2.7 (0.7-6.9)       | 0.00629              | 0.33050           |
|                               | MIP-1 $\beta$                         | 30.0 (14.9-40.5)    | 56.8 (29.7-71.5)    | 0.00134              | 0.09067           |
|                               | MIP-3 $\alpha$                        | 5.1 (4.4-5.5)       | 5.9 (5.5-7.6)       | 0.00196              | 0.12821           |
| <b>Effectors</b>              | Granzyme A                            | 3.4 (0-10.9)        | 11.1 (4.6-23.5)     | 0.00442              | 0.25324           |
|                               | Granzyme B                            | 10.4 (7.0-28.0)     | 20.2 (12.6-31.9)    | 0.01758              | 0.62295           |
| <b>Growth factors</b>         | BAFF                                  | 3.053 (1.051-4.074) | 4.283 (2.555-6.08)  | 0.01758              | 0.62295           |
|                               | bNGF                                  | 1.1 (0.9-3.1)       | 2.1 (1.2-4.6)       | 0.02762              | 0.75348           |
|                               | G-CSF                                 | 4.2 (0-89.4)        | 50.7 (25.3-116.3)   | 0.01299              | 0.51903           |
|                               | GM-CSF                                | 0 (0-0)             | 3.8 (0-20.5)        | 0.00256              | 0.16236           |
|                               | <b>HGF</b>                            | 6.4 (2.9-20.3)      | 56.2 (13.1-70.2)    | 0.00003              | <b>0.00253</b>    |
|                               | IL-7                                  | 0 (0-0)             | 0 (0-1.1)           | 0.02305              | 0.70251           |
|                               | IL-20                                 | 6.9 (5.5-10.5)      | 9.6 (6.7-21.8)      | 0.02509              | 0.72631           |
|                               | <b>IL-34</b>                          | 11.5 (8.3-18.5)     | 21.9 (13.7-43.9)    | 0.00051              | <b>0.03716</b>    |
|                               | LIF                                   | 0.6 (0.4-2.7)       | 2.4 (1.1-4.8)       | 0.00991              | 0.44448           |
|                               | VEGF-A                                | 50.02 (33.59-65.04) | 73.17 (35.73-156.1) | 0.0523 <sup>#</sup>  | 0.91076           |
| <b>Inflammatory cytokines</b> | <b>IFN-<math>\gamma</math></b>        | 1.8 (1.4-2.2)       | 3.9 (2.3-4.8)       | 0.00023              | <b>0.01737</b>    |
|                               | IL-1 $\alpha$                         | 3.9 (2.5-11.0)      | 6.9 (4.1-16.4)      | 0.04832              | 0.89752           |
|                               | IL-2                                  | 4.3 (3.2-6.2)       | 9.1 (4.5-14.7)      | 0.00940              | 0.43242           |
|                               | IL-8                                  | 0.7 (0.1-6.9)       | 5.5 (2.1-10.2)      | 0.01183              | 0.49255           |
|                               | IL-9                                  | 0.2 (0-1.4)         | 1.4 (0.5-3.0)       | 0.01134              | 0.48383           |
|                               | IL-17A                                | 0 (0-1.725)         | 0.98 (0-3.959)      | 0.05482 <sup>#</sup> | 0.91633           |
|                               | <b>IL-18</b>                          | 5.0 (3.4-7.1)       | 13.7 (7.2-50.8)     | 0.00002              | <b>0.00173</b>    |
|                               | TNF- $\alpha$                         | 2.2 (1.9-2.6)       | 2.7 (2.3-3.2)       | 0.00460              | 0.25884           |
|                               | TNF- $\beta$                          | 0.1 (0-2.2)         | 1.5 (0.4-4.8)       | 0.02021              | 0.66116           |
|                               | <b>Type II inflammatory cytokines</b> | IL-4                | 19.4 (11.2-35.1)    | 37.3 (18.5-77.2)     | 0.00901           |
| IL-5                          |                                       | 0 (0-0.2)           | 3.5 (0-12.3)        | 0.00290              | 0.17675           |
| IL-6                          |                                       | 0 (0-0.8)           | 1.5 (0-7.4)         | 0.03843              | 0.84757           |
| TSLP                          |                                       | 1.3 (0.8-2.2)       | 2.3 (1.7-3.4)       | 0.00791              | 0.38881           |
| <b>Soluble receptors</b>      | <b>PTX3</b>                           | 1137 (798-1924)     | 3045 (1557-5283)    | 0.00064              | <b>0.04533</b>    |
|                               | TREM-1                                | 0 (0-235.4)         | 248.2 (16.3-761.1)  | 0.02832              | 0.75524           |

684 **Note:** HCs, healthy controls; SCD, sickle cell disease. The Mann-Whitney test was used  
685 to compare differences between patients with SCD and healthy controls (HC) without  
686 and with Holm-Šídák correction for multiple comparisons. *p* < 0.05 was considered  
687 significant. <sup>#</sup>*p* < 0.06 was considered a clear trend toward significance.  
688

**Table 4. Correlations of upregulated inflammatory mediators with altered autoantibodies and RBC/reticulocyte-leukocyte aggregation**

| Categories                | Analytes               | Autoantibodies    |                 | Aggregation |
|---------------------------|------------------------|-------------------|-----------------|-------------|
|                           |                        | SSA/Ro60          | Myeloperoxidase | %           |
| Chemokines                | CCL23 <sup>&amp;</sup> |                   |                 | 0.88*       |
|                           | MIP-1 $\alpha$         |                   |                 | 0.88*       |
|                           | MIP-1 $\beta$          |                   | 0.37*           |             |
| Effector                  | Granzyme A             | 0.34 <sup>#</sup> |                 |             |
| Growth factors            | HGF <sup>&amp;</sup>   |                   |                 | 0.89*       |
|                           | IL-34 <sup>&amp;</sup> | 0.48**            |                 |             |
|                           | VEGF-A                 | 0.33 <sup>#</sup> |                 |             |
| Proinflammatory cytokines | IL-1 $\alpha$          | 0.35*             | 0.39*           |             |
|                           | IL-9                   | 0.36*             |                 |             |
| Type II cytokines         | IL-4                   | 0.48**            |                 |             |
|                           | IL-5                   | 0.33 <sup>#</sup> |                 |             |

**Note:** Aggregation, RBC/reticulocyte-leukocyte aggregation. Spearman correlation analyses were performed including age, gender and SCD genotype as covariables. \* $p < 0.05$ ; \*\*  $p < 0.01$ , \*\*\*  $p < 0.001$ , # $p < 0.06$ , a clear trend toward significance, &mediators with adjusted  $p < 0.05$  in Table 3.

**Table 5: Correlations of altered inflammatory mediators with time interval from VOC crisis**

|          | Days after crisis |               |       |       |        |       | Days before crisis     |            |
|----------|-------------------|---------------|-------|-------|--------|-------|------------------------|------------|
|          | Eotaxin-2         | GRO- $\alpha$ | IL-2  | IL-6  | IL-17A | LIF   | IL-18 <sup>&amp;</sup> | Granzyme A |
| <i>r</i> | 0.36              | 0.47          | 0.37  | 0.38  | 0.39   | 0.48  | -0.41                  | -0.43      |
| <i>p</i> | 0.058             | 0.010         | 0.051 | 0.044 | 0.035  | 0.008 | 0.028                  | 0.022      |

**Note:** VOC, vaso-occlusive. The linear relationship between two variables was calculated using the Spearman correlation test with age, gender, and SCD genotype as covariables, which generated coefficient values ( $r$ ) and statistical significance levels ( $p$ ).  $p < 0.05$  was considered significant,  $p < 0.06$ , a clear trend toward significance, &mediators with adjusted  $p < 0.05$  in Table 3.

**Table 6. Correlations of upregulated soluble factors/autoantibody with PROMs/Sensory sensitivity in SCD subjects**

| Categories                 | Biomarkers     | Patient-Reported Outcomes |              |                  |                         |        | Quantitative Sensory Testing |               |               |               |                 |                   |
|----------------------------|----------------|---------------------------|--------------|------------------|-------------------------|--------|------------------------------|---------------|---------------|---------------|-----------------|-------------------|
|                            |                | Pain Intensity            | Pain Episode | Depression Score | Physical Function Score | PedsQL | MDT (forearm)                | MPT (forearm) | MTS (forearm) | CPT (forearm) | PPT (trapezius) | PPTol (trapezius) |
| Chemokines                 | Eotaxin-2      |                           |              |                  |                         |        |                              |               |               |               |                 |                   |
|                            | CCL21          |                           |              |                  |                         |        | 0.41*                        |               |               |               |                 |                   |
|                            | <b>CCL23</b> & |                           |              | -0.46*           |                         |        |                              |               |               |               |                 |                   |
|                            | G-CSF          |                           |              |                  |                         | 0.47*  |                              |               |               |               |                 |                   |
|                            | GM-CSF         |                           |              |                  | -0.37*                  |        |                              |               |               |               |                 |                   |
|                            | GRO- $\alpha$  |                           | -0.50**      |                  | -0.43*                  |        |                              |               |               |               |                 |                   |
|                            | <b>IP-10</b> & |                           |              |                  |                         |        |                              |               |               |               |                 |                   |
|                            | <b>MCP-2</b> & |                           | -0.41*       |                  |                         |        |                              |               |               |               |                 |                   |
|                            | MIP-1 $\alpha$ |                           |              |                  |                         |        |                              | 0.45*         |               |               |                 |                   |
| MIP-1 $\beta$              |                |                           |              |                  |                         |        |                              |               |               |               |                 |                   |
| MIP-3 $\alpha$             |                |                           |              |                  |                         |        |                              |               |               |               |                 |                   |
| Effectors                  | Granzyme A     |                           |              |                  |                         | 0.36*  |                              |               |               |               |                 |                   |
|                            | Granzyme B     |                           | -0.37*       |                  | -0.51**                 |        | 0.51*                        |               |               |               |                 |                   |
| Growth factors             | BAFF           |                           |              |                  | -0.44*                  | 0.37*  |                              |               |               |               |                 |                   |
|                            | bNGF           |                           | -0.40*       | -0.46*           | -0.48**                 |        |                              |               |               |               |                 |                   |
|                            | <b>HGF</b> &   |                           |              |                  |                         |        |                              |               |               | -0.43*        |                 |                   |
|                            | IL-7           |                           | -0.46*       |                  |                         |        |                              |               |               |               |                 |                   |
|                            | IL-20          |                           |              |                  | -0.35#                  |        | 0.42*                        |               |               |               |                 |                   |
|                            | LIF            |                           |              |                  | -0.45*                  |        | 0.43*                        |               |               |               |                 |                   |
|                            | VEGF-A         |                           |              |                  |                         |        |                              |               |               |               |                 | -0.44*            |
| Pro-inflammatory cytokines | IL-2           |                           | -0.43*       |                  | -0.40*                  |        | 0.44*                        |               |               |               |                 |                   |
|                            | IL-8           |                           |              |                  |                         |        | 0.42*                        | -0.47*        |               |               |                 |                   |
|                            | IL-9           |                           |              |                  | -0.36#                  | 0.37*  |                              |               |               |               |                 |                   |
|                            | IL-17A         | -0.37*                    | -0.53**      |                  | -0.54**                 | 0.43*  | 0.46*                        |               |               |               |                 |                   |
|                            | TNF- $\alpha$  |                           |              |                  | -0.42*                  |        |                              |               |               |               |                 | -0.42*            |
|                            | TNF- $\beta$   |                           |              |                  | -0.41*                  |        | 0.49*                        |               |               |               |                 | -0.44*            |
| Type II cytokines          | IL-5           |                           |              |                  | -0.43*                  |        | 0.44*                        | -0.39#        |               |               |                 |                   |
|                            | IL-6           |                           |              |                  | -0.47*                  |        | 0.43*                        |               |               |               |                 |                   |
|                            | TSLP           |                           |              |                  | -0.53**                 |        | 0.49*                        |               |               |               |                 |                   |
| Soluble R                  | TREM-1         |                           | -0.42*       |                  | -0.39*                  |        |                              |               | -0.45*        | 0.53**        |                 |                   |
| AutoAb                     | MPO            |                           |              |                  | -0.37*                  |        |                              |               |               | 0.49**        | 0.44*           |                   |

719 **Note:** PROMs, patient-reported outcome measures; Pain Episode, Pain Episode  
720 Frequency/Recency; MDT, mechanical detection threshold; MPT, mechanical pain  
721 threshold; MTS, mechanical temporal summation; CPT, cold pain threshold; PPT,  
722 pressure pain threshold; PPTol, pressure pain tolerance; Soluble R, soluble receptor;  
723 AutoAb, autoantibody; MPO, myeloperoxidase. Spearman correlation analyses were  
724 performed including age, gender and SCD genotype as covariables. \* $p < 0.05$ ; \*\*  $p <$

725 0.01, \*\*\*  $p < 0.00$ , # $p < 0.06$ , a clear trend toward significance, &mediators with adjusted  
726  $p < 0.05$  shown in Table 3.  
727

## 728 **References**

- 729 1. R. E. Ware, M. de Montalembert, L. Tshilolo, M. R. Abboud, Sickle cell disease. *Lancet*  
730 **390**, 311-323 (2017).
- 731 2. D. C. Rees, T. N. Williams, M. T. Gladwin, Sickle-cell disease. *Lancet* **376**, 2018-2031  
732 (2010).
- 733 3. O. O. Ilesanmi, Pathological basis of symptoms and crises in sickle cell disorder:  
734 implications for counseling and psychotherapy. *Hematol Rep* **2**, e2 (2010).
- 735 4. E. M. Novelli, M. T. Gladwin, Crises in Sickle Cell Disease. *Chest* **149**, 1082-1093  
736 (2016).
- 737 5. D. S. Darbari, V. A. Sheehan, S. K. Ballas, The vaso-occlusive pain crisis in sickle cell  
738 disease: Definition, pathophysiology, and management. *Eur J Haematol* **105**, 237-246  
739 (2020).
- 740 6. K. Takaoka, A. C. Cyril, S. Jinesh, R. Radhakrishnan, Mechanisms of pain in sickle cell  
741 disease. *Br J Pain* **15**, 213-220 (2021).
- 742 7. H. Tran, M. Gupta, K. Gupta, Targeting novel mechanisms of pain in sickle cell disease.  
743 *Hematology Am Soc Hematol Educ Program* **2017**, 546-555 (2017).
- 744 8. S. K. Ballas, K. Gupta, P. Adams-Graves, Sickle cell pain: a critical reappraisal. *Blood*  
745 **120**, 3647-3656 (2012).
- 746 9. V. Char et al., Aggregation of mononuclear and red blood cells through an  
747 alpha4beta1-Lu/basal cell adhesion molecule interaction in sickle cell disease.  
748 *Haematologica* **95**, 1841-1848 (2010).
- 749 10. B. E. Gee, O. S. Platt, Sickle reticulocytes adhere to VCAM-1. *Blood* **85**, 268-274 (1995).

- 750 11. C. C. Joneckis, R. L. Ackley, E. P. Orringer, E. A. Wayner, L. V. Parise, Integrin alpha 4  
751 beta 1 and glycoprotein IV (CD36) are expressed on circulating reticulocytes in sickle  
752 cell anemia. *Blood* **82**, 3548-3555 (1993).
- 753 12. J. E. Brittain, J. Han, K. I. Ataga, E. P. Orringer, L. V. Parise, Mechanism of CD47-  
754 induced alpha4beta1 integrin activation and adhesion in sickle reticulocytes. *J Biol Chem*  
755 **279**, 42393-42402 (2004).
- 756 13. A. Kumar, J. R. Eckmam, R. A. Swerlick, T. M. Wick, Phorbol ester stimulation increases  
757 sickle erythrocyte adherence to endothelium: a novel pathway involving alpha 4 beta 1  
758 integrin receptors on sickle reticulocytes and fibronectin. *Blood* **88**, 4348-4358 (1996).
- 759 14. M. Udani *et al.*, Basal cell adhesion molecule/lutheran protein. The receptor critical for  
760 sickle cell adhesion to laminin. *J Clin Invest* **101**, 2550-2558 (1998).
- 761 15. W. El Nemer *et al.*, The Lutheran blood group glycoproteins, the erythroid receptors for  
762 laminin, are adhesion molecules. *J Biol Chem* **273**, 16686-16693 (1998).
- 763 16. R. P. Hebbel, Adhesive interactions of sickle erythrocytes with endothelium. *J Clin Invest*  
764 **100**, S83-86 (1997).
- 765 17. N. Conran, J. D. Belcher, Inflammation in sickle cell disease. *Clin Hemorheol Microcirc*  
766 **68**, 263-299 (2018).
- 767 18. H. Elmariah *et al.*, Factors associated with survival in a contemporary adult sickle cell  
768 disease cohort. *Am J Hematol* **89**, 530-535 (2014).
- 769 19. A. Turhan, L. A. Weiss, N. Mohandas, B. S. Collier, P. S. Frenette, Primary role for  
770 adherent leukocytes in sickle cell vascular occlusion: a new paradigm. *Proc Natl Acad*  
771 *Sci U S A* **99**, 3047-3051 (2002).
- 772 20. T. C. Hofstra, V. K. Kalra, H. J. Meiselman, T. D. Coates, Sickle erythrocytes adhere to  
773 polymorphonuclear neutrophils and activate the neutrophil respiratory burst. *Blood* **87**,  
774 4440-4447 (1996).

- 775 21. R. Zennadi, A. Chien, K. Xu, M. Batchvarova, M. J. Telen, Sickle red cells induce  
776 adhesion of lymphocytes and monocytes to endothelium. *Blood* **112**, 3474-3483 (2008).
- 777 22. J. E. Brittain, C. M. Knoll, K. I. Ataga, E. P. Orringer, L. V. Parise, Fibronectin bridges  
778 monocytes and reticulocytes via integrin alpha4beta1. *Br J Haematol* **141**, 872-881  
779 (2008).
- 780 23. S. Allali, T. T. Maciel, O. Hermine, M. de Montalembert, Innate immune cells, major  
781 protagonists of sickle cell disease pathophysiology. *Haematologica* **105**, 273-283 (2020).
- 782 24. R. Sesti-Costa *et al.*, Inflammatory Dendritic Cells Contribute to Regulate the Immune  
783 Response in Sickle Cell Disease. *Front Immunol* **11**, 617962 (2020).
- 784 25. O. A. Adisa *et al.*, Association between plasma free haem and incidence of vaso-  
785 occlusive episodes and acute chest syndrome in children with sickle cell disease. *Br J*  
786 *Haematol* **162**, 702-705 (2013).
- 787 26. H. H. Al-Habboubi *et al.*, The relation of vascular endothelial growth factor (VEGF) gene  
788 polymorphisms on VEGF levels and the risk of vasoocclusive crisis in sickle cell disease.  
789 *Eur J Haematol* **89**, 403-409 (2012).
- 790 27. N. A. Redha, N. Mahdi, H. H. Al-Habboubi, W. Y. Almawi, Impact of VEGFA -583C > T  
791 polymorphism on serum VEGF levels and the susceptibility to acute chest syndrome in  
792 pediatric patients with sickle cell disease. *Pediatr Blood Cancer* **61**, 2310-2312 (2014).
- 793 28. A. L. Silva-Junior *et al.*, Immunological Hallmarks of Inflammatory Status in Vaso-  
794 Occlusive Crisis of Sickle Cell Anemia Patients. *Front Immunol* **12**, 559925 (2021).
- 795 29. S. Curtis, A. M. Brandow, Responsiveness of Patient-Reported Outcome Measurement  
796 Information System (PROMIS) pain domains and disease-specific patient-reported  
797 outcome measures in children and adults with sickle cell disease. *Hematology Am Soc*  
798 *Hematol Educ Program* **2017**, 542-545 (2017).
- 799 30. A. M. Brandow, R. A. Farley, J. A. Panepinto, Neuropathic pain in patients with sickle  
800 cell disease. *Pediatr Blood Cancer* **61**, 512-517 (2014).

- 801 31. R. Freynhagen, R. Baron, U. Gockel, T. R. Tolle, painDETECT: a new screening  
802 questionnaire to identify neuropathic components in patients with back pain. *Curr Med*  
803 *Res Opin* **22**, 1911-1920 (2006).
- 804 32. D. J. Clauw, Fibromyalgia: a clinical review. *JAMA* **311**, 1547-1555 (2014).
- 805 33. J. Dudeney, E. F. Law, A. Meyyappan, T. M. Palermo, J. A. Rabbitts, Evaluating the  
806 psychometric properties of the Widespread Pain Index and the Symptom Severity scale  
807 in youth with painful conditions. *Can J Pain* **3**, 137-147 (2019).
- 808 34. C. M. Campbell *et al.*, An Evaluation of Central Sensitization in Patients With Sickle Cell  
809 Disease. *J Pain* **17**, 617-627 (2016).
- 810 35. J. A. Panepinto *et al.*, PedsQL sickle cell disease module: feasibility, reliability, and  
811 validity. *Pediatr Blood Cancer* **60**, 1338-1344 (2013).
- 812 36. D. S. Darbari *et al.*, Frequency of Hospitalizations for Pain and Association With Altered  
813 Brain Network Connectivity in Sickle Cell Disease. *J Pain* **16**, 1077-1086 (2015).
- 814 37. Y. Wang *et al.*, Alteration of grey matter volume is associated with pain and quality of life  
815 in children with sickle cell disease. *Transl Res* **240**, 17-25 (2022).
- 816 38. R. E. Miller *et al.*, Quantitative sensory testing in children with sickle cell disease:  
817 additional insights and future possibilities. *Br J Haematol* **185**, 925-934 (2019).
- 818 39. D. S. Darbari *et al.*, Central sensitization associated with low fetal hemoglobin levels in  
819 adults with sickle cell anemia. *Scand J Pain* **17**, 279-286 (2017).
- 820 40. H. Nahman-Averbuch *et al.*, The role of stimulation parameters on the conditioned pain  
821 modulation response. *Scand J Pain* **4**, 10-14 (2013).
- 822 41. C. J. Schoen *et al.*, A novel paradigm to evaluate conditioned pain modulation in  
823 fibromyalgia. *J Pain Res* **9**, 711-719 (2016).
- 824 42. F. Syed *et al.*, Excessive Matrix Metalloproteinase-1 and Hyperactivation of Endothelial  
825 Cells Occurred in COVID-19 Patients and Were Associated With the Severity of COVID-  
826 19. *J Infect Dis* **224**, 60-69 (2021).



- 827 43. R. Yoshimi, A. Ueda, K. Ozato, Y. Ishigatsubo, Clinical and pathological roles of Ro/SSA  
828 autoantibody system. *Clin Dev Immunol* **2012**, 606195 (2012).
- 829 44. S. K. Reader *et al.*, Systematic Review: Pain and Emotional Functioning in Pediatric  
830 Sickle Cell Disease. *J Clin Psychol Med Settings* **27**, 343-365 (2020).
- 831 45. V. Sagi, A. Mittal, H. Tran, K. Gupta, Pain in sickle cell disease: current and potential  
832 translational therapies. *Transl Res* **234**, 141-158 (2021).
- 833 46. A. E. Alagbe, I. F. Domingos, A. D. Adekile, M. Blotta, M. N. N. Santos, Anti-  
834 inflammatory cytokines in sickle cell disease. *Mol Biol Rep* **49**, 2433-2442 (2022).
- 835 47. A. Driss *et al.*, Elevated IL-1alpha and CXCL10 serum levels occur in patients with  
836 homozygous sickle cell disease and a history of acute splenic sequestration. *Dis*  
837 *Markers* **32**, 295-300 (2012).
- 838 48. R. B. Francis, Jr., L. J. Haywood, Elevated immunoreactive tumor necrosis factor and  
839 interleukin-1 in sickle cell disease. *J Natl Med Assoc* **84**, 611-615 (1992).
- 840 49. O. T. Gbotosho, J. Gollamudi, H. I. Hyacinth, The Role of Inflammation in The Cellular  
841 and Molecular Mechanisms of Cardiopulmonary Complications of Sickle Cell Disease.  
842 *Biomolecules* **13** (2023).
- 843 50. B. Keikhaei *et al.*, Altered levels of pro-inflammatory cytokines in sickle cell disease  
844 patients during vaso-occlusive crises and the steady state condition. *Eur Cytokine Netw*  
845 **24**, 45-52 (2013).
- 846 51. M. H. Qari, U. Dier, S. A. Mousa, Biomarkers of inflammation, growth factor, and  
847 coagulation activation in patients with sickle cell disease. *Clin Appl Thromb Hemost* **18**,  
848 195-200 (2012).
- 849 52. A. Pathare *et al.*, Cytokine profile of sickle cell disease in Oman. *Am J Hematol* **77**, 323-  
850 328 (2004).

- 851 53. T. M. Sakamoto *et al.*, Increased adhesive and inflammatory properties in blood  
852 outgrowth endothelial cells from sickle cell anemia patients. *Microvasc Res* **90**, 173-179  
853 (2013).
- 854 54. K. Asare *et al.*, Plasma interleukin-1beta concentration is associated with stroke in sickle  
855 cell disease. *Cytokine* **49**, 39-44 (2010).
- 856 55. B. A. Cerqueira, W. V. Boas, A. D. Zanette, M. G. Reis, M. S. Goncalves, Increased  
857 concentrations of IL-18 and uric acid in sickle cell anemia: contribution of hemolysis,  
858 endothelial activation and the inflammasome. *Cytokine* **56**, 471-476 (2011).
- 859 56. N. Conran *et al.*, Inhibition of caspase-dependent spontaneous apoptosis via a cAMP-  
860 protein kinase A dependent pathway in neutrophils from sickle cell disease patients. *Br J*  
861 *Haematol* **139**, 148-158 (2007).
- 862 57. M. Zachlederova, P. Jarolim, The dynamics of gene expression in human lung  
863 microvascular endothelial cells after stimulation with inflammatory cytokines. *Physiol Res*  
864 **55**, 39-47 (2006).
- 865 58. N. Patel *et al.*, Placenta growth factor (PlGF), a novel inducer of plasminogen activator  
866 inhibitor-1 (PAI-1) in sickle cell disease (SCD). *J Biol Chem* **285**, 16713-16722 (2010).
- 867 59. M. Lamkanfi, Emerging inflammasome effector mechanisms. *Nat Rev Immunol* **11**, 213-  
868 220 (2011).
- 869 60. V. A. Rathinam, K. A. Fitzgerald, Inflammasome Complexes: Emerging Mechanisms and  
870 Effector Functions. *Cell* **165**, 792-800 (2016).
- 871 61. F. Bauernfeind, V. Hornung, Of inflammasomes and pathogens--sensing of microbes by  
872 the inflammasome. *EMBO Mol Med* **5**, 814-826 (2013).
- 873 62. K. Midtbo, D. Eklund, E. Sarndahl, A. Persson, Molecularly Distinct NLRP3 Inducers  
874 Mediate Diverse Ratios of Interleukin-1beta and Interleukin-18 from Human Monocytes.  
875 *Mediators Inflamm* **2020**, 4651090 (2020).

- 876 63. N. M. de Vasconcelos, M. Lamkanfi, Recent Insights on Inflammasomes, Gasdermin  
877 Pores, and Pyroptosis. *Cold Spring Harb Perspect Biol* **12** (2020).
- 878 64. A. H. Chan, K. Schroder, Inflammasome signaling and regulation of interleukin-1 family  
879 cytokines. *J Exp Med* **217** (2020).
- 880 65. T. Satoh, A. Otsuka, E. Contassot, L. E. French, The inflammasome and IL-1beta:  
881 implications for the treatment of inflammatory diseases. *Immunotherapy* **7**, 243-254  
882 (2015).
- 883 66. M. C. Durpes *et al.*, Effect of interleukin-8 and RANTES on the Gardos channel activity  
884 in sickle human red blood cells: role of the Duffy antigen receptor for chemokines. *Blood*  
885 *Cells Mol Dis* **44**, 219-223 (2010).
- 886 67. M. C. Durpes *et al.*, Activation state of alpha4beta1 integrin on sickle red blood cells is  
887 linked to the duffy antigen receptor for chemokines (DARC) expression. *J Biol Chem*  
888 **286**, 3057-3064 (2011).
- 889 68. D. Bratosin *et al.*, Programmed cell death in mature erythrocytes: a model for  
890 investigating death effector pathways operating in the absence of mitochondria. *Cell*  
891 *Death Differ* **8**, 1143-1156 (2001).
- 892 69. E. Nader, M. Romana, P. Connes, The Red Blood Cell-Inflammation Vicious Circle in  
893 Sickle Cell Disease. *Front Immunol* **11**, 454 (2020).
- 894 70. T. Jang *et al.*, Vaso-occlusive crisis in sickle cell disease: a vicious cycle of secondary  
895 events. *J Transl Med* **19**, 397 (2021).
- 896 71. A. U. Zaidi *et al.*, A systematic literature review of frequency of vaso-occlusive crises in  
897 sickle cell disease. *Orphanet J Rare Dis* **16**, 460 (2021).
- 898 72. S. Veluswamy *et al.*, Vaso-Occlusion in Sickle Cell Disease: Is Autonomic Dysregulation  
899 of the Microvasculature the Trigger? *J Clin Med* **8** (2019).
- 900 73. M. Shimizu, S. Takei, M. Mori, A. Yachie, Pathogenic roles and diagnostic utility of  
901 interleukin-18 in autoinflammatory diseases. *Front Immunol* **13**, 951535 (2022).

- 902 74. D. Pilat *et al.*, Blockade of IL-18 signaling diminished neuropathic pain and enhanced the  
903 efficacy of morphine and buprenorphine. *Mol Cell Neurosci* **71**, 114-124 (2016).
- 904 75. M. Garzon-Tituana *et al.*, Granzyme A inhibition reduces inflammation and increases  
905 survival during abdominal sepsis. *Theranostics* **11**, 3781-3795 (2021).
- 906 76. R. R. da Silva *et al.*, Evaluation of Th17 related cytokines associated with clinical and  
907 laboratorial parameters in sickle cell anemia patients with leg ulcers. *Cytokine* **65**, 143-  
908 147 (2014).
- 909 77. G. Ndrepepa, Myeloperoxidase - A bridge linking inflammation and oxidative stress with  
910 cardiovascular disease. *Clin Chim Acta* **493**, 36-51 (2019).
- 911 78. H. Zhang *et al.*, Inhibition of myeloperoxidase decreases vascular oxidative stress and  
912 increases vasodilatation in sickle cell disease mice. *J Lipid Res* **54**, 3009-3015 (2013).
- 913 79. A. M. Brandow *et al.*, Children and adolescents with sickle cell disease have worse cold  
914 and mechanical hypersensitivity during acute painful events. *Pain* **160**, 407-416 (2019).
- 915 80. P. Chalacheva *et al.*, Autonomic responses to cold face stimulation in sickle cell disease:  
916 a time-varying model analysis. *Physiol Rep* **3** (2015).
- 917 81. P. Shah *et al.*, Mental stress causes vasoconstriction in subjects with sickle cell disease  
918 and in normal controls. *Haematologica* **105**, 83-90 (2020).
- 919 82. M. J. Telen *et al.*, Alloimmunization in sickle cell disease: changing antibody specificities  
920 and association with chronic pain and decreased survival. *Transfusion* **55**, 1378-1387  
921 (2015).
- 922 83. T. Wun, The Role of Inflammation and Leukocytes in the Pathogenesis of Sickle Cell  
923 Disease; Haemoglobinopathy. *Hematology* **5**, 403-412 (2001).
- 924
